1 **A Second Generation Leishmanization Vaccine with a Markerless Attenuated *Leishmania***  
2 ***major* Strain using CRISPR gene editing**

3  
4  
5 **Authors:** Wen Wei Zhang<sup>1\*</sup>, Subir Karmakar<sup>2\*</sup>, Sreenivas Gannavaram<sup>2\*</sup>, Ranadhir Dey<sup>2\*</sup>,  
6 Patrick Lypaczewski<sup>1</sup>, Nevien Ismail<sup>2</sup>, Abid Siddiqui<sup>2</sup>, Vahan Simonyan<sup>2</sup>, Fabiano Oliveira<sup>3</sup>,  
7 Iliano V. Coutinho-Abreu<sup>3</sup>, Thiago DeSouza-Vieira<sup>3</sup>, Claudio Meneses<sup>3</sup>, James Oristian<sup>3</sup>, Tiago  
8 D. Serfim<sup>3</sup>, Abu Musa<sup>4</sup>, Risa Nakamura<sup>4</sup>, Noushin Saljoughian<sup>5</sup>, Greta Volpedo<sup>5</sup>, Monika  
9 Satoskar<sup>2</sup>, Sanika Satoskar<sup>2</sup>, Pradeep K Dagur, J Philip McCoy<sup>6</sup>, Shaden Kamhawi<sup>3</sup>, Jesus G.  
10 Valenzuela<sup>3</sup>, Shinjiro Hamano<sup>4</sup>, Abhay Satoskar<sup>5#</sup>, Greg Matlashewski<sup>1#</sup>, Hira L. Nakhasi<sup>2#</sup>

11  
12 **Affiliations:**

13 <sup>1</sup>Department of Microbiology and Immunology, McGill University Montreal Canada, H3A 2B4;

14 <sup>2</sup>Division of Emerging and Transfusion Transmitted Diseases, CBER, FDA, Silver Spring, MD  
15 20993;

16 <sup>3</sup>Vector Molecular Biology Section, Laboratory of Malaria and Vector Research, National  
17 Institute of Allergy and Infectious Diseases, National Institutes of Health, Rockville, Maryland  
18 20852, USA;

19 <sup>4</sup>Department of Parasitology, Institute of Tropical Medicine (NEKKEN), The Joint  
20 Usage/Research Center on Tropical Disease, Nagasaki University, Nagasaki, Japan and Nagasaki  
21 University Graduate School of Biomedical Sciences Doctoral Leadership Program, Nagasaki,  
22 Japan.

23 <sup>5</sup>Department of Pathology and Microbiology, Ohio State University, Columbus, OHIO USA  
24 43210.

25 <sup>6</sup>National Institute of Heart, Lung and Blood Institute, NIH, Bethesda, MD, USA 20852

26 \*These authors contributed equally

27 # Co-Corresponding authors

28

29 **Abstract:** Leishmaniasis is a debilitating and often fatal neglected tropical disease caused by  
30 *Leishmania* protozoa transmitted by infected sand flies. Vaccination through leishmanization with  
31 live *Leishmania major* has been used successfully but is no longer practiced because it resulted in  
32 unacceptable skin lesions. A second generation leishmanization is described here using a CRISPR  
33 genome edited *L. major* strain (*LmCen*<sup>-/-</sup>). Notably, *LmCen*<sup>-/-</sup> is the first genetically engineered  
34 gene deleted *Leishmania* strain that is antibiotic resistant marker free and does not have any off-  
35 target mutations. Mice immunized with *LmCen*<sup>-/-</sup> had virtually no visible lesions following  
36 challenge with *L. major*-infected sand flies while non-immunized animals developed large and  
37 progressive lesions with a 2-log fold higher parasite burden. *LmCen*<sup>-/-</sup> immunization showed  
38 protection and an immune response comparable to leishmanization. *LmCen*<sup>-/-</sup> is safe since it was  
39 unable to cause disease even in immunocompromised mice, induces robust host protection against  
40 vector sand fly challenge and because it is marker free, can be advanced to human vaccine trials.  
41

## 42 **Introduction**

43 Leishmaniasis is a neglected disease caused by infection with protozoans of the genus *Leishmania*  
44 that is transmitted by infected sand flies<sup>1</sup>. Worldwide, an estimated 1 billion people are at risk of  
45 infection in tropical and subtropical countries where up to 1.7 million new cases in 98 countries  
46 occur each year<sup>2,3</sup>. The disease pathology ranges from localized skin ulcers (cutaneous  
47 leishmaniasis, CL) to fatal systemic disease (visceral leishmaniasis, VL), depending on the species  
48 of the infecting *Leishmania* parasite<sup>1,4</sup>. Treatment options for both VL and CL are limited and there  
49 is poor surveillance in the most highly endemic countries<sup>1,5</sup>. A prophylactic vaccine would be an  
50 effective intervention for protection against this disease, reducing transmission and supporting the  
51 elimination of leishmaniasis globally. Currently there are no available vaccines against any form  
52 of human leishmaniasis.

53 Unlike most parasitic infections, patients who recover from leishmaniasis naturally or following  
54 drug treatment develop immunity against reinfection indicating that the development of an  
55 effective vaccine should be feasible<sup>6-8</sup>. Furthermore, leishmanization, a process in which  
56 deliberate infections with a low dose of virulent *Leishmania major* provides greater than 90%  
57 protection against reinfection and has been used in several countries of the Middle East and the  
58 former Soviet Union<sup>9-11</sup>. Leishmanization is however no longer practiced because it is ethically  
59 unacceptable due to the resulting skin lesions that last for months at the site of inoculation. The  
60 overall strategy of this study is to develop the next generation leishmanization that is safer by  
61 providing a protective immune response against cutaneous leishmaniasis without causing skin  
62 lesions.

63 In case of leishmaniasis cell mediated immunity is critical, and particularly, CD4 T cells play a  
64 crucial role in the protection against CL<sup>12</sup>. Specifically, host defense involves Th1 response due to  
65 T- cells primed by antigen presenting cells producing IL-12<sup>13</sup>. Production of IL-12 by antigen  
66 presenting cells and IFN $\gamma$  by T cells are crucial for controlling the parasite numbers<sup>13</sup>. In contrast,  
67 Th2 cytokines, mainly IL-4, IL-5 and IL-13, an anti-inflammatory cytokine, suppress host  
68 immunity and help parasite survival while minimizing the tissue damage due to unchecked  
69 inflammation<sup>13,14</sup>. The differential effects of Th1 and Th2 dichotomy in cutaneous leishmaniasis  
70 is extensively studied in murine models<sup>15</sup>.

71

72 Studies with several candidate vaccines against CL including leishmanization demonstrated that  
73 the establishment of predominant Th1 type of immune response correlated with protection<sup>16-18</sup>. In  
74 murine leishmanization models, it is well established that IFN- $\gamma$  producing CD4 Th1 cells are  
75 essential in mediating protective immunity against re-infection<sup>19,20</sup>. Multifunctional effector Th1  
76 cells which also produce high IFN- $\gamma$  play a crucial role in host protection<sup>21</sup>. Recently it has been  
77 shown in leishmanized mice that rapidly recruited short lived effector T cells producing IFN- $\gamma$   
78 conferred significant level of protection and could be used as a biomarker of host protection<sup>22,23</sup>.  
79 These studies collectively show that any effective vaccine should similarly maintain these antigen  
80 specific CD4 T cell populations long enough to induce a robust protection against reinfection.

81

82 Centrin is a calcium binding protein and essential in the duplication of centrosomes in eukaryotes  
83 including *Leishmania*<sup>24,25</sup>. Previously, we have shown that *centrin* gene-deficient *Leishmania*  
84 *donovani* parasites are viable in axenic promastigote culture but do not proliferate in infected  
85 macrophages and are highly efficacious as a live vaccine in animal models<sup>26-31</sup>. However, using

86 live-attenuated *L. donovani* as a vaccine in humans is high-risk because of the potential for  
87 visceralization resulting in fatal visceral disease. Further, previously generated gene deleted *L.*  
88 *donovani* strains required the incorporation of antibiotic resistance marker genes. The presence of  
89 antibiotic resistance genes in any attenuated live vaccine renders the vaccine unacceptable by  
90 regulatory agencies for human vaccine trials.

91  
92 To overcome these drawbacks, we used CRISPR-Cas genome editing recently established for  
93 *Leishmania*<sup>32-34</sup> to generate an attenuated *L. major* *centrin* gene deletion mutant (*LmCen*<sup>-/-</sup>). This  
94 represents a major milestone because *LmCen*<sup>-/-</sup> is the first gene deleted *Leishmania* parasite to be  
95 developed containing no antibiotic resistant selection genes, an essential prerequisite for approval  
96 by regulatory agencies and advancement to human trials. *L. major* was used because this species  
97 is safer than *L. donovani* since *L. major* remains in the skin at the site of infection and does not  
98 cause visceral disease<sup>1,4</sup>. As demonstrated within, vaccination with *LmCen*<sup>-/-</sup> is safe, immunogenic  
99 and protective against sand fly transmitted *L. major* infection, that mimics natural infection in  
100 highly relevant cutaneous leishmaniasis animal models meeting efficacy and ethical standards for  
101 advancement to human clinical studies.

102

### 103 **Results:**

#### 104 *Generation and selection of centrin deficient L. major (LmCen<sup>-/-</sup>) by CRISPR-Cas*

105 CRISPR-Cas genome editing has recently been developed to delete *Leishmania* genes with or  
106 without integration of antibiotic selection markers into the genome<sup>32-34</sup>. The experimental  
107 approach used to delete the *centrin* gene (Gene ID: LmjF.22.1410) from *L. major* is detailed in  
108 Figure 1. Two guide sequences targeted to the 5' and 3' flanking sequences of the *centrin* gene

109 were designed and cloned into the *Leishmania* CRISPR vector pLdCNa&b (18, Figure 1A) and  
110 transfected into *L. major* (Friedlin V9) promastigotes. To delete the *centrin* gene sequence  
111 precisely at the locations determined by the 2 guide RNA sequences flanking the *centrin* gene  
112 without using marker gene replacement, a 50-nucleotide oligonucleotide donor DNA sequence  
113 was transfected into the promastigotes containing the CRISPR expression vector pLdCN as  
114 previously described<sup>33</sup>. The donor DNA consisted of 25 nucleotides 5' from the upstream gRNAa  
115 cleavage site and 25 nucleotides 3' from the downstream gRNAb cleavage site (Figure 1B). The  
116 exact targeted sequences flanking the *centrin* gene and diagnostic PCR primers are shown in  
117 Supplementary Figure 1A.

118

119 *L. donovani centrin* null promastigotes proliferate slower than wildtype promastigotes<sup>35</sup>. Since  
120 *centrin*-null promastigotes were selection marker free, this slower proliferation phenotype was  
121 used to identify *centrin* null *L. major* promastigotes. The CRISPR-genome edited *L. major*  
122 promastigotes were subjected to single cell cloning in 96 well plates; the relatively slow growing  
123 clones were identified, expanded and subjected to PCR analysis with the primers flanking the  
124 *centrin* gene as shown in Figure 1B. An example of a PCR analysis of a slow growing clone with  
125 the loss of the *centrin* gene is shown in Figure 1C. Sequence analysis of the 604 bp PCR product  
126 shown in Figure 1C confirmed the *centrin* gene containing sequence was precisely deleted at the  
127 predicted gRNA target sites and the chromosome fused through the donor sequence as intended  
128 (Figure 1D). The gRNA / Cas9 expressing pLdCN plasmid was subsequently removed from the *L.*  
129 *major centrin* null mutant (*LmCen*<sup>-/-</sup>) by single cell cloning and maintaining replica cultures in the  
130 presence and absence of G418 to identify clones sensitive to G418 that had lost the neomycin  
131 resistance gene present in the pLdCN CRISPR gene-editing plasmid. It was not possible amplify

132 plasmid DNA from the G418 sensitive *LmCen*<sup>-/-</sup> parasite providing further evidence for the loss of  
133 the pLdCN plasmid (Supplementary Figure 1B). As also shown in a Supplemental Figure 1C, the  
134 *LmCen*<sup>-/-</sup> parasite retained the phenotype of slower proliferation than the WT *L. major*. This  
135 difference in proliferation enabled the identification and isolation of the slower growing *centrin*  
136 gene deleted clones by visual and microscopy inspection of the 96 well plate after one week in  
137 culture.

138

139 *LmCen*<sup>-/-</sup> promastigotes failed to produce lesions in infected mice

140 It was necessary to establish whether the *LmCen*<sup>-/-</sup> had lost the ability to cause cutaneous infections  
141 and whether adding back the *centrin* gene through plasmid transfection (add-back, *LmCen*<sup>-/-</sup>AB)  
142 could restore cutaneous infection. The *centrin* gene was inserted into the *Leishmania* pKSNeo  
143 expression plasmid<sup>36,37</sup>, transfected into *LmCen*<sup>-/-</sup> promastigotes and expression of the centrin  
144 protein was confirmed by Western blotting with an  $\alpha$ -LdCen antibody that can recognize *L. major*  
145 centrin (Figure 1E). *LmCen*<sup>-/-</sup> infection was investigated following intradermal injection of  $1 \times 10^6$   
146 stationary phase promastigotes in the ear of C57BL/6 mice. As shown in Figure 1F, by 5-6 weeks,  
147 *LmCen*<sup>-/-</sup> failed to produce swelling in the infected ear whereas wildtype *L. major* (*LmWT*) Friedlin  
148 V9 and the *LmCen*<sup>-/-</sup> with the add-back *centrin* gene (*LmCen*<sup>-/-</sup>AB) did induce significant swelling.  
149 At 6 weeks following infection, the *LmCen*<sup>-/-</sup> infected mice had few (<10) detectable parasites  
150 compared to both the *LmWT* and *LmCen*<sup>-/-</sup>AB infected mice that both had significantly more  
151 parasites ( $\sim 2 \times 10^6$ ) (Figure 1G). These observations confirm that at 6 weeks post-infection,  
152 marker-free *LmCen*<sup>-/-</sup> is unable to induce pathology at the site of injection in mice and that this was  
153 due to the deletion of the *centrin* gene.

154 We next examined *LmCen*<sup>-/-</sup> survival in human macrophages *in vitro* since these are the obligate  
155 host cells for intracellular replication of *Leishmania* amastigotes (Supplementary Figure 1D). At  
156 24 h post-infection, the number of parasites per macrophage was similar in the *LmCen*<sup>-/-</sup> and *LmWT*  
157 infected cells. However, by 8 days, *LmCen*<sup>-/-</sup> amastigotes were cleared from the macrophages,  
158 whereas *LmWT* parasites reached >10 parasites/macrophage. These results demonstrated that the  
159 *LmCen*<sup>-/-</sup> promastigotes effectively infected human macrophages but subsequently were unable to  
160 proliferate intracellularly.

161

#### 162 *LmCen*<sup>-/-</sup> contains no off-target gene deletions

163 Since the CRISPR generated *LmCen*<sup>-/-</sup> strain was attenuated, it was necessary to establish the  
164 integrity of the genome by whole genome sequencing analysis to confirm the attenuation seen was  
165 solely due to the removal of the *centrin* gene. This analysis confirmed that the targeted ~1kb  
166 genome region containing the 450 bp *centrin* gene (ID:LmjF.22.1410) was deleted from  
167 chromosome 22 and the remaining *centrin* gene homologs on chromosomes 7, 32, 34 and 36  
168 remained intact in the genome (Figure 2A). Southern blot analysis confirmed the targeted *centrin*  
169 gene in *LmCen*<sup>-/-</sup> was deleted and not translocated to another region of the genome (Figure 2B).  
170 Whole genome sequencing was performed to establish whether there were any off-target gene  
171 deletions in the edited genome. As shown in Figure 2C, the blue line is comprised of over 8,000  
172 circles, each circle representing a single gene from chromosome 1 through 36 (left to right)  
173 whereas the red circles represent the members of the *centrin* gene family located on chromosomes  
174 7, 22, 32, 34 and 36. There was virtually 100% coverage for all 8307 genes in the genome  
175 indicating the absence of partial or complete gene deletions, except the targeted *centrin*  
176 (LmjF.22.1410) that had a 0% coverage since it was deleted through CRISPR gene editing. A



177 handful of genes (open blue circles) with less than 100% coverage are tandem repeat genes for  
178 which the coverage calculation software misaligned some reads, these genes were manually  
179 inspected and were found to be intact. Compared to the *L. major* Friedlin reference genome, there  
180 were no indels and no new SNPs (21 genes contained SNPs that were all previously identified in  
181 resequencing of the *L. major* Friedlin or LV39 strains). Collectively, these analyses demonstrate  
182 that the *LmCen*<sup>-/-</sup> genome is intact and has no off-target gene mutations.

183 The genomic DNA sequence reads were also searched for the presence of pLdCN CRISPR plasmid  
184 DNA sequences to confirm the loss of this plasmid. As shown in Figure 2D, the only *LmCen*<sup>-/-</sup>  
185 genomic DNA sequences in common with the pLdCN CRISPR plasmid was the A2 gene  
186 intergenic sequence (A2-IGS) that is part of a A2 pseudogene sequence present in the *L. major*  
187 genome. The A2-IGS sequence from *L. donovani* was incorporated into the pLdCN CRISPR  
188 plasmid for processing of the Neo<sup>R</sup> gene transcript<sup>32</sup>. There were no other detectable plasmid  
189 sequences or antibiotic resistance genes in the genome of *LmCen*<sup>-/-</sup>. It is noteworthy that the *L.*  
190 *donovani* ribosomal RNA promoter (rRNAP) sequence in the pLdCN CRISPR plasmid is  
191 sufficiently divergent from the *L. major* rRNAP sequence that it was not identified in the MiSeq  
192 DNA sequences by the Maximal Exact Match (bwa-mem) sequence alignment algorithm used.  
193 Taken together, the results presented in Figure 2D and Supplementary Figure 1B in combination  
194 with the loss of G418 resistance demonstrate that the pLdCN CRISPR gene-editing plasmid is no  
195 longer present in *LmCen*<sup>-/-</sup>. This represents a significant milestone since *LmCen*<sup>-/-</sup> is the first marker  
196 free gene deleted *Leishmania* strain to be generated in the laboratory.

197

198

199 *Immunization with live  $LmCen^{-/-}$  is safe and does not cause lesions in highly susceptible mice*

200 As shown in Figure 1,  $LmCen^{-/-}$  was unable to induce ear cutaneous lesions in C57BL/6 mice due  
201 to the removal of the *centrin* gene. However, to assess the safety of  $LmCen^{-/-}$  as a potential live  
202 vaccine, it was necessary to investigate its attenuation in a more susceptible mouse strain  
203 (BALB/c) and in immune deficient mice. BALB/c mice injected subcutaneously in the footpad  
204 with  $1 \times 10^7$  stationary phase  $LmCen^{-/-}$  showed no footpad swelling over 20 weeks (Figure 3A),  
205 the study endpoint, and a significantly lower parasite burden (approximately 4 log fold reduction)  
206 as compared to BALB/c mice injected with  $LmWT$  (Figure 3A). In some animals  $LmCen^{-/-}$  parasites  
207 were completely cleared by the study end point. Likewise, STAT-1 KO immune deficient mice  
208 injected with  $2 \times 10^8$   $LmCen^{-/-}$  stationary phase parasites showed no footpad swelling during 7  
209 weeks following injection (Figure 3B) whereas footpad swelling started at 4 weeks after injection  
210 with  $LmWT$  (Figure 3B). The parasite burden at 7 weeks in STAT-1 KO mice injected with  $LmWT$   
211 was significantly higher than the mice injected with  $LmCen^{-/-}$  attenuated parasites (approximately  
212 6 log fold reduction, Fig 3B). In another test, IFN- $\gamma$  KO mice showed severe footpad swelling  
213 accompanied by a drastic increase in the number of the parasites after injection with  $1 \times 10^7$   $LmWT$ ,  
214 while injection with the same dose of  $LmCen^{-/-}$  did not show any footpad swelling in 20 weeks and  
215 the parasites were cleared from the site of injection (Figure 3C). The recombination activating  
216 gene 2 deficient (Rag2 KO) mice, which lack conventional T cells and B cells, showed mild  
217 footpad swelling and a high parasite burden in the footpad after 15 weeks following injection with  
218  $LmWT$  (Figure 3D). In contrast, injection with  $LmCen^{-/-}$  did not show any swelling (Figure 3D;  
219 Supplementary Figure 2C) and the parasites were cleared from the site of injection (Figure 3D)  
220 and the spleen and liver (Supplementary Figure 2D). These results demonstrate that  $LmCen^{-/-}$  is  
221 non-pathogenic even in highly immunocompromised mice.

222 To rule out the survival of any undetectable *LmCen*<sup>-/-</sup> parasites beyond 7 weeks post-immunization,  
223 *LmCen*<sup>-/-</sup> infected BALB/c mice were treated with 2 mg/kg dexamethasone (DXM), a known  
224 immune suppressor, three times for a week starting at 10 weeks post-infection (Figure 3E). All the  
225 groups were sacrificed at 4 weeks after the DXM treatment to determine parasite burdens. As  
226 shown in Figure 3F and Supplementary Figure 2A, *LmCen*<sup>-/-</sup> infected mice with or without DXM  
227 treatment resulted in no lesions while *LmWT* infected but DXM-untreated mice developed open  
228 ulcerative lesions in the ear. Moreover, only 2 of 12 DXM-treated mice infected with *LmCen*<sup>-/-</sup>  
229 showed parasites in the inoculated ear (Figure 3G) and draining lymph node (Figure 3H). In 1 of  
230 6 untreated *LmCen*<sup>-/-</sup>-immunized animals, a low parasite number was detected in the draining  
231 lymph node (<100 parasites, Figure 3H), and none in the ear (Figure 3G). In *LmWT* infected mice,  
232 a significantly higher parasite load was observed in the ear and draining lymph node compared to  
233 *LmCen*<sup>-/-</sup> -infected mice ( $\pm$  DXM) (Figure 3G, H), which correlated with ear lesion size (Figure  
234 3F). Further, a PCR analysis using *L. major centrin* gene specific primers confirmed the absence  
235 of the *centrin* gene in the parasites isolated from DXM-treated mice (Supplementary Figure 2B  
236 lane 1, red arrow). Collectively, these results revealed that the centrin deleted live *LmCen*<sup>-/-</sup>  
237 parasites are unable to revert or cause pathology and are safe for further study as a live vaccine.

238

239 *LmCen*<sup>-/-</sup> immunization induced protection against needle infection with wildtype *L. major*

240 To investigate the protective efficacy of *LmCen*<sup>-/-</sup> against wildtype *L. major*, both resistant  
241 (C57BL/6) and susceptible (BALB/c) mice were immunized with a single intradermal (i.d.)  
242 injection with  $1 \times 10^6$  stationary phase *LmCen*<sup>-/-</sup> in one ear. Seven weeks post-immunization, mice  
243 were challenged with 750 metacyclic wildtype *L. major* (WR 2885 strain) parasites in the  
244 contralateral ear via the i.d. route (Figure 4A for C57BL/6; Supplementary Figure 3A for BALB/c).

245 Following challenge with wildtype *L. major*, lesion development was assessed up to 10 weeks for  
246 the C57BL/6 mice (Figure 4B, C). In the non-immunized-challenged group, mice developed a non-  
247 healing open ulcer that progressively increased in size (Figure 4C). No open ulcers were observed  
248 in the *LmCen*<sup>-/-</sup>-immunized-challenged group and only a moderate swelling that subsided from 5-  
249 9 weeks post-challenge was observed in 6 of 13 mice. Figure 4C depicts the ear pathology at 10  
250 weeks post-challenge compared to a naïve unchallenged ear. Importantly, histopathological  
251 analysis revealed no clear difference between immunized-challenged and naïve mice ears, while  
252 non-immunized-challenged mice ears developed large lesions with open ulcers involving an influx  
253 of inflammatory cells (Figure 4C). The parasite load in the challenged ear and draining lymph node  
254 were also quantified at 10 weeks post-challenge revealing that the immunized group had a  
255 significantly lower parasite load (approximately a 4-log fold and a 3.2-log fold reduction,  
256 respectively) compared to the non-immunized group (Figure 4D, E). Similarly, highly susceptible  
257 BALB/c mice were protected following immunization with *LmCen*<sup>-/-</sup> parasites (Supplementary  
258 Figure 3A-E). At 10 weeks post-challenge with wildtype *L. major* parasites, immunized BALB/c  
259 mice were protected as measured both by a reduced lesion size (Supplementary Figure 3B, C) and  
260 parasite burden (Supplementary Figure 3D, E) compared to non-immunized-challenged mice. A  
261 similar lack of non-healing open ulcer was observed in *LmCen*<sup>-/-</sup> immunized BALB/c mice  
262 challenged with other wildtype strains of *L. major* such as *L. major* FV9 (Supplementary Figure  
263 3F) and *L. major* LV39 (Supplementary Figure 3G).

264

#### 265 *LmCen*<sup>-/-</sup> immunization induced protection against sand fly transmitted *L. major* infection

266 It is substantially more difficult and more relevant to demonstrate immunological protection  
267 against *L. major* infection initiated by a sandfly challenge than by a needle injection challenge<sup>20,38</sup>.

268 Therefore, to determine the efficacy of *LmCen*<sup>-/-</sup> immunization against sand fly transmitted  
269 cutaneous infection by *L. major*, C57BL/6 mice were immunized with a single i.d. injection of 1  
270  $\times 10^6$  *LmCen*<sup>-/-</sup> stationary phase parasites and mice were infected by exposure to bites of 10 *L.*  
271 *major*-infected sand flies in the contralateral ear 7 weeks post-immunization (Figure 5A). Disease  
272 progression was monitored for 10 weeks post-challenge by measuring lesion growth and assessing  
273 parasite burden in the ear and draining lymph node (Figure 5B-E). Notably, only 1/12 immunized-  
274 challenged mice developed a visible lesion, while 10/14 non-immunized-challenged mice  
275 developed progressive lesions in the ear that were significantly larger than the single lesion  
276 observed in immunized-challenged mice (Figure 5B, C). At 10 weeks post-challenge, there was a  
277 significant reduction of the parasite burden both in the ear and draining lymph node (approximately  
278 2 log fold reduction in both) of immunized-challenged mice compared to non-immunized-  
279 challenged mice (Figure 5D, E). It is interesting to note that some of the draining lymph nodes in  
280 the immunized-challenged mice did not have any parasites (Figure 5E). These results demonstrate  
281 that immunization with *LmCen*<sup>-/-</sup> mediates significant protection under natural conditions of  
282 infection i.e. parasite transmission by an infected sand fly.

283  
284 *LmCen*<sup>-/-</sup> immunization or healed from primary infection with *LmWT* (leishmanization) induced  
285 comparable host protective immune response against *L. major* infection

286 Previously, in murine leishmanization models, it was shown that leishmanization induces host  
287 protective immunity against re-infection<sup>19,20</sup>. Having shown above that *LmCen*<sup>-/-</sup> induces  
288 protection against both needle and the natural model of sand fly challenge, we first compared the  
289 immune response between *LmCen*<sup>-/-</sup> immunized group (8 weeks of post-immunization) and a  
290 primary *LmWT* infection (healed group) at 12-weeks of post-primary infection (Figure 6A). The

291 ears from the healed group showed lesions that later resolved. In the *LmCen*<sup>-/-</sup> immunized group  
292 however, no lesion development was observed (Supplementary Figure 4A). Antigen experienced  
293 CD4<sup>+</sup> T cells were first gated based on their surface expression of CD44 (Supplementary Figure  
294 4B) and CD4<sup>+</sup>CD44<sup>+</sup> cells were rearranged into different subpopulations based on their production  
295 of TNF- $\alpha$ , IFN- $\gamma$ , and IL-2. The results showed that both *LmCen*<sup>-/-</sup> immunization and healed groups  
296 of mice induced comparable single as well as multiple cytokines secreting CD4<sup>+</sup>CD44<sup>+</sup>T cells  
297 upon re-stimulation with *L. major* freeze-thaw antigen (*LmFTAg*) (Figure 6B & C). Naïve mice  
298 (not immunized with *LmCen*<sup>-/-</sup> or infected with *LmWT*) did not show any detectable immune  
299 response after antigen stimulation (Figure 6B). Upon challenge with wildtype *L. major* parasites  
300 by needle injection, at 20hr post-infection, we observed a significant increase in the mRNA levels  
301 of IFN- $\gamma$  in both healed and *LmCen*<sup>-/-</sup> immunized ear tissues compared to nonimmunized mice  
302 (Figure 6D). From the same time point after challenge (20hr post-infection), we also analyzed the  
303 IFN- $\gamma$  production from effector CD4 T cells by flow cytometry. Both healed and *LmCen*<sup>-/-</sup>  
304 immunized mice induced a significantly higher percentage of IFN- $\gamma$ <sup>+</sup> effector T cells  
305 (CD4<sup>+</sup>CD44<sup>+</sup>T-bet<sup>+</sup>Ly6C<sup>+</sup>) compared to the non-immunized group (Figure 6E). Supplementary  
306 Figure 4C shows common gating strategies for early immune response (CD4<sup>+</sup>CD44<sup>Hi</sup>T-bet<sup>+</sup>Ly-  
307 6C<sup>+</sup> IFN- $\gamma$ <sup>+</sup>-T cells) in the ear of non-immunized, healed and *LmCen*<sup>-/-</sup> immunized mice at 20hours  
308 post needle challenge with wildtype *L. major* parasites.  
309 Healed and *LmCen*<sup>-/-</sup> immunized groups were also challenged with *L. major* WT infected sand fly  
310 and the parasite loads were determined (Figure 6A). After five weeks of post-challenge, there was  
311 a similar significant reduction of parasite burden in the ear (2.4 log fold in healed group, and 2.1  
312 log fold in *LmCen*<sup>-/-</sup> immunized group) and draining lymph nodes (1.7 log fold in healed group,  
313 and 1.48 log fold in *LmCen*<sup>-/-</sup> immunized group) compared to non-immunized group (Figure 6F

314 and 6G). Both healed and *LmCen*<sup>-/-</sup> immunized challenged mice did not develop any lesions  
315 whereas non-immunized challenged mice developed cutaneous lesions (Supplementary Figure  
316 4D). Taken together, these results demonstrate that *LmCen*<sup>-/-</sup> immunization is as effective as  
317 leishmanization (*LmWT* infection/healed) in generating a protective immune response and  
318 protecting against sand fly mediated infection with WT *L. major*.

319

## 320 **Discussion:**

321 Leishmanization with wildtype *L. major* has so far been the only successful human vaccine for  
322 leishmaniasis but it is ethically unacceptable because it causes skin lesions that last for months.  
323 This paper describes a second generation leishmanization live vaccination with an attenuated *L.*  
324 *major* strain (*LmCen*<sup>-/-</sup>) that does not cause lesions but retains the ability to provide immunological  
325 protection against experimental needle and sand fly transmitted *Leishmania* infection. As *LmCen*<sup>-/-</sup>  
326 <sup>-/-</sup> is marker gene free safe and efficacious, can be advanced to Phase I human clinical trials.

327

328 CRISPR-Cas genome editing was essential to generating this marker free strain because this  
329 technology can delete genes with high specificity and fidelity without selection with antibiotic  
330 resistant marker genes<sup>32-34</sup>. In place of antibiotic marker selection, the selection was based on a  
331 reduced proliferation rate of the *LmCen*<sup>-/-</sup> mutant identified through single cell cloning, the first  
332 time such a selection has been performed in *Leishmania*. Whole genome sequence analysis  
333 confirmed that only the *centrin* gene on chromosome 22 (ID:LmjF.22.1410) was precisely deleted  
334 at the CRISPR guide RNA targeting sites and other *centrin* gene members on chromosomes 7, 32,  
335 34 and 36 remained intact. There were no CRISPR-induced off-target gene deletions, indels or  
336 nonsynonymous SNPs introduced in the *LmCen*<sup>-/-</sup> clone that was subjected to whole genome

337 sequencing. By comparison, a previously engineered *L. donovani centrin* gene deleted parasites  
338 generated by homologous recombination with antibiotic resistant marker genes did contain off-  
339 target genomic deletions of up to 5000 base pairs in non-coding regions and in the coding regions  
340 of the folate transporter and gp63 genes<sup>39</sup>. Although gene-targeting specificity will depend largely  
341 on the selection of the guide RNA sequence, these observations suggest that CRISPR-Cas gene  
342 editing in *Leishmania* using a donor DNA fragment for repair as detailed in Figure 1 is more  
343 specific than traditional homologous recombination-based gene replacement with antibiotic  
344 resistance markers. In theory, it could have also been possible to generate a *centrin* gene deleted  
345 markerless *L. major* parasite using a different CRISPR approach involving the transfection of  
346 recombinant SaCas9 protein with *in vitro* –transcribed guide RNAs directed to upstream and  
347 downstream sequences flanking the *centrin* gene<sup>40</sup>. Although deletion of other *Leishmania*  
348 virulence genes may likewise generate attenuated strains, the *centrin* gene was targeted in this  
349 study because centrin gene deleted *L. donovani* parasites have been the most extensively validated  
350 parasites in previous experimental vaccine studies using various animal models<sup>26–31</sup>. It is  
351 noteworthy that in this study, *L. major* was used instead of the previous studies involving *centrin*  
352 deleted *L. donovani*<sup>26–31</sup> as the focus of this study was cutaneous leishmaniasis.

353 Numerous experimental vaccines have been developed for *Leishmania*, though most of them have  
354 not been tested against natural sand fly transmitted infections. In studies when such vaccines were  
355 tested by needle challenge versus sand fly transmission of a virulent parasite, they were either  
356 partially protective or not protective against the latter<sup>20,38,41,42</sup>. In addition, sand fly mediated  
357 infection provides other components present in the saliva which play an important role in the  
358 pathogenesis of *Leishmania*<sup>43–45</sup>. The observations reported here demonstrated that markerless  
359 *LmCen*<sup>-/-</sup> immunization did induce protection against sand fly transmitted *L. major*. In this study,



360 a major obstacle to using a live vaccine, the risk of disease development, was overcome by  
361 engineering a markerless second generation live attenuated parasite that can confer protection  
362 without associated pathology. Live attenuated *LmCen*<sup>-/-</sup> parasites elicited protective immunity in  
363 both susceptible (BALB/c) and resistant (C57BL/6) mice and against different strains of *L. major*  
364 (WR 2885, FV9 and LV39). Importantly *LmCen*<sup>-/-</sup> parasites elicited protection against sand fly  
365 challenge that was deemed necessary but was neither performed or was not demonstrated in  
366 previous vaccination studies<sup>20,38,41,42</sup>. These observations using a cutaneous model of infection are  
367 consistent with our previous findings that immunization with *LdCen*<sup>-/-</sup> parasites were protective  
368 against visceral leishmaniasis in different animal models<sup>26-28,30,46</sup>.

369 In previous studies evaluating *Leishmania* vaccines, researchers have used mice with healed  
370 cutaneous lesions following a low dose of wildtype *L. major* infection as a gold standard animal  
371 model that mimics leishmanization in humans<sup>23,38,47</sup>. In this study, we have also compared *LmCen*<sup>-/-</sup>  
372 parasite immunization induced immunity with wildtype *L. major* infected, healed mice  
373 (leishmanization). Our results demonstrated comparable immune responses in mice either healed  
374 from wildtype infection or immunized with *LmCen*<sup>-/-</sup>. It has been shown that chronic parasite  
375 infection maintains Ly6C<sup>+</sup>CD4<sup>+</sup> effector T cells, and upon challenge with *LmWT* parasites these  
376 are essential for IFN- $\gamma$  production that mediates protection<sup>22</sup>. Our results established that upon  
377 challenge with *LmWT* parasites, both *LmCen*<sup>-/-</sup> immunized and healed mice generated a  
378 comparable percentage of CD4<sup>+</sup>Ly6C<sup>+</sup>IFN- $\gamma$ <sup>+</sup> effector T cells. In addition, protection may also be  
379 mediated by tissue resident memory T cells (Trm) that are called upon immediately after challenge  
380 as was shown in leishmanization mouse model<sup>47</sup>. Future studies with *LmCen*<sup>-/-</sup> will address the  
381 role of Trm cell as well as other memory phenotype T cells in *LmCen*<sup>-/-</sup> vaccine immunity.  
382 Moreover, upon *L. major* infected sand fly challenge, both groups are protected, and the levels of

383 protection are comparable in terms of parasite burden. The residual parasite burden observed in  
384 both ear and lymph nodes in the *LmCen*<sup>-/-</sup> may be important for maintaining long term protection  
385 as was reported in previous studies with leishmanized mice<sup>22,48</sup>. However, unlike leishmanization  
386 which involved inoculation of low dose of virulent parasites that caused lesions at the site of  
387 injection, immunization with *LmCen*<sup>-/-</sup> parasites is safe as demonstrated by the absence of visible  
388 lesions in susceptible and immunodeficient animals post-immunization, in spite of persistence of  
389 a low number of *LmCen*<sup>-/-</sup> parasites at the site of inoculation.

390 In conclusion, this study demonstrated that *LmCen*<sup>-/-</sup> parasites are safe and can protect against a  
391 sand fly challenge with a wildtype *L. major* infection in relevant mouse models. Future studies are  
392 required to establish whether vaccination with *LmCen*<sup>-/-</sup> is safe and protective in humans. The  
393 combination of old (leishmanization) and new (CRISPR gene editing) technologies can result in  
394 major advances in vaccine design that has the potential to protect millions of people from this  
395 major neglected disease.

396

## 397 **Materials and Methods:**

### 398 *Leishmania strain and culture medium:*

399 *L. major* Friedlin (FV9) and *L. major* LV39 used in this study were routinely passaged into the  
400 footpads of BALB/c mice. Amastigotes isolated from infected lesions were grown in M199  
401 medium and promastigotes were cultured at 27°C in M199 medium (pH 7.4) supplemented with  
402 10% heat-inactivated fetal bovine serum, 40 mM HEPES (pH 7.4), 0.1 mM adenine, 5 mg  
403 I<sup>-1</sup>hemin, 1 mg I<sup>-1</sup> biotin, 1 mg I<sup>-1</sup> bioppterin, 50 U ml<sup>-1</sup> penicillin and 50 µg ml<sup>-1</sup> streptomycin.  
404 Cultures were passaged to fresh medium at a 40-fold dilution once a week. The growth curve of

405 *L. major* promastigotes was obtained by inoculating the parasite at  $1 \times 10^6$  / ml into the 96 well  
406 plate (150  $\mu$ l/well) in quadruplicate, the OD values were measured once a day for 4 days.

407 *L. major* WR 20885 strain was used to infect sand flies. This strain of parasites was isolated from  
408 a soldier deployed to Iraq and were grown at 27°C in Schneider's medium supplemented with 10%  
409 heat-inactivated FCS, penicillin (100 U/ml), streptomycin (100  $\mu$ g/ml), 2 mM l-glutamine. The  
410 WR2885 strain is shown to have superior colonization and transmissibility by sand flies to mice  
411 resulting in more severe pathology (larger lesion size and higher parasite loads)<sup>38,49</sup>.

412

#### 413 ***CRISPR Plasmid Construction:***

414 The pLdCNLm221410a&b plasmid vector was generated as follows: 1) A 276 bp PCR fragment  
415 containing gRNALm221410a, hepatitis delta virus and hammerhead ribozymes and  
416 gRNALm221410b guide coding sequences was amplified with primers Lm221410a and  
417 Ld221410b from the gRNA 241510+MT co-expression vector previously described<sup>33,34</sup>. The PCR  
418 product from step 1 was digested with Bbs I and inserted into the Bbs I digested pLdCN vector<sup>33,34</sup>  
419 to generate the pLdCNLm221410a&b plasmid vector which was verified by sequencing analysis  
420 at the McGill University and Genome Quebec Innovation Center.

421 Guide RNA sequences and the oligonucleotide donor used in this study are listed below and their  
422 locations in the *centrin* locus are indicated in the Supplementary Figure 1.

423 gRNAa (Lm221410a):

424 5'ATCGAAGACCTTTGTCTTCTCGCAATCCTTCTGCTGTTTTAGAGCTAGAAATAGCA

425 AG

426 gRNA<sub>b</sub> (Lm221410b):

427 5'ATCGAAGACCCAAACTTGAGAGGGAAAGCAACGGACACCATGACGAGCTTACTC

428 Oligo donor (Lm221410):

429 5'ATTCGTGCTTCTCGCAATCCTTCTCAACGGATGATAGTGCG CGTGTGCG

430

431 ***Selection of Centrin gene deleted clones and single cell cloning:***

432 *Leishmania* transfections were performed as previously described<sup>37</sup>. Briefly, 10 µg  
433 pLdCNLm221410a&b plasmid DNA was electroporated into  $1 \times 10^8$  early stationary phase *L.*  
434 *major* promastigotes. The transfected cells were then selected with G418 (100 µg/ml) for 2 weeks.  
435 Once the transfected *L. major* culture was established, the surviving promastigotes were subjected  
436 to three rounds of transfection with the oligonucleotide donor (Lm221410 oligo donor); 10 µl 100  
437 µM single strand oligonucleotide donor was used per transfection, once every three days. After the  
438 third oligonucleotide donor transfection, the *Leishmania* promastigotes were counted and  
439 inoculated into 96 well plates at one promastigote per 100 µl medium per well. The growth of  
440 *Leishmania* cells in 96 well plates was monitored under microscope. After culture for three  
441 weeks in 96 well plates, parasites from the relatively slow growing clones were expanded in 24  
442 well plates. The slow growing clones were selected since this represents the phenotype for loss  
443 of the *centrin* gene<sup>35</sup>. The genomic DNA extracted from the slow growth clones were subjected  
444 to PCR and DNA sequencing analysis to confirm deletion of the *centrin* gene.

445 To remove the pLdCNLm221410a&b plasmid from the *centrin* gene deleted *L. major* strain,  
446 individual clones were grown in duplicate plates where one plate contained media with G418 and

447 the duplicate plate contained media without G418. Clones that had lost the plasmid were identified  
448 since they lost the ability to survive in the presence of G418.

449

#### 450 ***Genome sequence analysis of $LmCen^{-/-}$***

451 Complete genome sequencing of two clones from  $LmCen^{-/-}$  was determined by MiSeq genome  
452 sequencing reaction on an Illumina sequencing instrument at the sequencing core facility at the  
453 Center for Biologics Evaluation and Research.  $LmCen^{-/-}$  sequence reads were aligned against  
454 *Leishmania major* Friedlin strain reference genome (retrieved from [www.tritrypdb.org](http://www.tritrypdb.org)) using the  
455 Burrows-Wheeler Aligner Maximal Exact Match algorithm (BWA-MEM)<sup>50</sup>. The alignments were  
456 converted to BED files using samtools and processed using the bedtools software package<sup>51,52</sup>. The  
457 bedtools coverage command was used with the “-d” option in conjunction with the genomic  
458 intervals containing the centrin genes to count the read depth at each position in the coverage of  
459 centrin genes shown in Figure 2A with a 200 bp window. The bedtools coverage command was  
460 used in conjunction with gene coordinates extracted from the gff genomic annotation file (retrieved  
461 from [www.tritrypdb.org](http://www.tritrypdb.org)<sup>53</sup>) to compute the percent coverage of each gene as shown in Figure 2C.  
462 Genes with less than 100 percent coverage were manually inspected for a sharp drop-off in  
463 coverage (deletion) versus a gradual decline in close proximity to an inverse increase in coverage  
464 in a tandem gene (misalignment).

465

#### 466 ***Re-expression of centrin in $LmCen^{-/-}$***

467 The open reading frame encoding *centrin* gene was cloned into the SpeI sites of the *Leishmania*  
468 expression plasmid pKSNeo.  $LmCen^{-/-}$  parasites were transfected with the plasmid and

469 recombinant parasites were selected using 50 µg/ml G418 to obtain *LmCen*<sup>-/-</sup> parasites re-  
470 expressing centrin gene termed *LmCen*<sup>-/-</sup> Addback (*LmCen*<sup>-/-</sup>AB).

471

#### 472 ***Southern hybridization:***

473 Total genomic DNA was isolated from promastigotes with the Wizard genomic DNA purification  
474 kit (Promega Biosciences). The DNA (5µg) was digested with restriction enzymes with BglI and  
475 the digestion products were separated on 1% agarose gels and transferred to positively charged  
476 nitrocellulose membranes. Southern blot analysis of the resolved DNA was performed as described  
477 previously using a <sup>32</sup>p-labelled *L. major* centrin ORF nucleotide sequence as a probe<sup>39</sup>. The DNA  
478 fragments were ligated into pCR2.1-Topo vector and the nucleotide sequence of the probe was  
479 determined to ensure fidelity. The plasmid containing the correct probe was digested with EcoRI,  
480 gel purified and labeled with Random Prime it-II kit using <sup>32</sup>p-dCTP (Agilent Technologies).

481

#### 482 ***Mice infection and immunization:***

483 Female 5- to 6-wk-old C57BL/6 and BALB/c mice were immunized and/or infected with  $1 \times 10^6$   
484 total stationary phase *LmCen*<sup>-/-</sup> or *L. major* wildtype (*LmWT*) parasites by intradermal injection in  
485 the left ear in 10 µl PBS. For challenge infections, age-matched naive and seven-week post  
486 immunized mice (both C57BL/6 and BALB/c) were challenged in the right ear with 750  
487 metacyclic *L. major* (WR 2885 strain) wildtype promastigotes intradermally. The numbers of *L.*  
488 *major* (WR 2885) parasites in the infectious inoculum were determined by a titration analysis  
489 revealing that 750 metacyclic parasites cause reproducible pathology in BALB/c mice ear. For  
490 leishmanization, mice were infected with  $1 \times 10^4$  metacyclic promastigotes of *L. major* Friedlin

491 (FV9) strain by intradermal needle injection in the ear. After 12 weeks of post-infection, healed  
492 mice were challenged on the contralateral ear with  $1 \times 10^5$  metacyclic *L. major* WR 2885 wildtype  
493 (*LmWT*) parasites by needle inoculation.

494 Lesion size was monitored up to 10 weeks post-challenge by measuring the diameter of the ear  
495 lesion using a direct reading Vernier caliper. Parasite burden in the challenged ear and draining  
496 lymph node (dLN) was estimated by limiting dilution analysis as previously described<sup>37</sup>. Briefly,  
497 two sheets of ear dermis were separated, deposited in DMEM containing 100 U/ml penicillin, 100  
498  $\mu\text{g/ml}$  streptomycin, and 0.2 mg/ml Liberase CI purified enzyme blend (Roche Diagnostics Corp.),  
499 and incubated for 1-2 h at 37°C. Digested tissue was processed in a tissue homogenizer  
500 (Medimachine; Becton Dickinson) and filtered through a 70  $\mu\text{m}$  cell strainer (Falcon Products).  
501 Parasite titrations in the ear and dLN were performed by serial dilution (1:1 dilutions) of tissue  
502 homogenates in 96-well flat-bottom microtiter plates (Corning, Corning, NY) in M199 cell culture  
503 media in duplicate and incubated at 26°C without CO<sub>2</sub> for 7–10 days. The greatest dilution yielding  
504 viable parasites was recorded and data are presented the mean parasite dilution  $\pm$  SD. For  
505 histology, challenged ears were fixed, after 10 weeks of post WT parasite infection, in fixative  
506 solutions (10% buffered formalin phosphate solution) and paraffin-embedded sections were  
507 stained with hematoxylin and eosin (H&E) (Histoserv Inc.).

508 BALB/c mice were immunized subcutaneously in the footpad with  $2 \times 10^8$  *LmCen*<sup>-/-</sup> parasites of  
509 the Friedlin strain or injected with PBS. After 6 weeks both groups were challenged with  $10^4$   
510 virulent metacyclics of LV39 *L. major* parasites intra-dermally in the ear. Ear lesions of vaccinated  
511 and non-vaccinated mice (PBS group) challenged with *L. major* LV39 metacyclic promastigotes  
512 were measured at least once a week from week 1 post challenge to week 10 post challenge.

513 BALB/c, IFN- $\gamma$  KO and Rag2 KO mice were subcutaneously inoculated with  $1 \times 10^7$  of *LmWT*  
514 (Friedlin V9) or *LmCen*<sup>-/-</sup> into the right hind footpad. Following infection, footpad swelling was  
515 measured weekly by digital caliper. Parasite burden in infected footpad was measured at 5 weeks  
516 after infection in BALB/c, at or at 15 weeks in IFN- $\gamma$  KO and Rag2 KO mice. STAT-1 KO mice  
517 were injected subcutaneously in the footpad with  $2 \times 10^8$  *LmCen*<sup>-/-</sup> parasites of the Friedlin strain  
518 or infected with  $2 \times 10^8$  *L. major* WT parasites of the Friedlin strain. Footpad swelling of both  
519 groups was measured at least once a week from week 1 after injection to week 7. After 7 weeks  
520 both groups were sacrificed, and parasite burden was determined. Footpad lesions was excised and  
521 then homogenized with a cell strainer in 3 ml of Schneider's Drosophila medium (Gibco, US)  
522 supplemented with 20% heat-inactivated fetal calf serum and Penicillin-Streptomycin (0.1%).

523

524 ***Sand fly infection and transmission of L. major to immunize mice:***

525 Female *Lutzomyia longipalpis* (Jacobina strain, reared at the Laboratory of Malaria and Vector  
526 Research, NIAID) sand flies were infected by artificial feeding through a chick skin membrane on  
527 a suspension of  $5 \times 10^6$  *L. major* (WR 2855 strain) procyclic promastigotes/ml of heparinized  
528 defibrinated blood containing penicillin and streptomycin. Flies with mature infections were used  
529 for transmission<sup>54</sup>. One day before transmission the sucrose diet was removed. Mice were  
530 anesthetized by intraperitoneal injection of 30  $\mu$ l of ketamine/xylazine (100 mg/ml). Ointment was  
531 applied to the eyes to prevent corneal dryness. Ten infected flies were applied to right ears of both  
532 *LmCen*<sup>-/-</sup> immunized and age-matched naïve C57BL/6 mice through a meshed surface of vials  
533 which were held in place by custom made clamps. The flies were allowed to feed on the exposed  
534 ear for a period of 2–3 h in the dark at 23°C and 50% humidity. Following exposure, the number



535 of flies per vial with or without a blood meal was counted to determine the influence of feeding  
536 intensity on transmission frequency. Animals were sacrificed after 10 weeks of post sand fly  
537 exposure & organ parasite burden were determined by serial dilution as described above.

538

### 539 ***Human macrophage infection:***

540 Human elutriated monocytes obtained from NIH blood bank from healthy US blood donors. Only  
541 monocytes that tested CMV negative were used in this study. Monocytes were re-suspended at 2  
542  $\times 10^5$  cells/ml in RPMI medium containing 10% FBS and human macrophage colony-stimulating  
543 factor (20 ng/ml, ProSpec), plated in a volume of 0.5 ml in eight-chamber Lab-Tek tissue culture  
544 slides (Miles Laboratories) and incubated for 7 days for differentiation into macrophages. The  
545 differentiated macrophages were infected with stationary phase *LmWT* or *LmCen<sup>-/-</sup>* promastigotes  
546 (10:1 parasite-to-macrophage ratio). After incubation for 6 h at 37°C in 5% CO<sub>2</sub>, the free  
547 extracellular parasites were removed by RPMI washes and the cultures were incubated in  
548 macrophage culture medium for an additional 24 h. The culture medium was removed, and  
549 macrophages infected with *LmWT* or *LmCen<sup>-/-</sup>* were stained with Diff-Quik staining reagent.  
550 Percentages of infected macrophages were determined by counting a minimum of 100  
551 macrophages per sample under the microscope. Results are shown as mean  $\pm$  SEM for three  
552 independent counts for each infection on days 1-8.

553

### 554 **RT-PCR:**

555 Total RNA was extracted from the ears tissue using a Pure Link RNA Mini kit (Ambion). Total  
556 RNA (400ng) was reverse transcribed into cDNA using random hexamers with a high-capacity

557 cDNA reverse transcription kit (Applied Biosystems). Gene expressions were determined using  
558 TaqMan Gene Expression Master Mix and premade TaqMan Gene Expression assays (Applied  
559 Biosystems) using a CFX96 Touch real-time system (Bio-Rad, CA) and the data were analyzed  
560 with CFX Manager software. The TaqMan Gene Expression Assay ID (Applied Biosystems) of  
561 IFN- $\gamma$  (Mm01168134\_m1) and GAPDH (Mm99999915\_g1). Expression values were determined  
562 by the  $2^{-\Delta\Delta Ct}$  method where samples were normalized to GAPDH expression and determined  
563 relative to naive sample.

564

565 ***Measurement of cytokine expression from ear derived CD4<sup>+</sup> T cell populations by flow cytometry:***

566 To determine the comparative immune response at pre- or 20 h post-*L. major* WT needle challenge,  
567 single-cell suspensions from ear of healed (leishmanized) and *LmCen*<sup>-/-</sup> immunized mice were  
568 incubated with  $1 \times 10^6$  T-cell depleted (Miltenyi Biotech) naïve spleen cells (APCs), with 50  $\mu$ g/ml  
569 freeze-thaw *L. major* antigen (*LmFTAg*) in flat bottom 48-well plates at 37°C for 12-14 h. During  
570 last 4 h of culture, protein Transport Inhibitor (BD Golgiplug, BD Bio-Sciences) was added to the  
571 wells. Cells were then blocked at 4°C with rat  $\alpha$ -mouse CD16/32 (5  $\mu$ g/ml) from BD BioSciences  
572 for 20 min. For surface staining, cells were then stained with  $\alpha$ -mouse CD3 AF-700 (BD  
573 BioSciences),  $\alpha$ -mouse CD4 BV-650 (Biolegend) and  $\alpha$ -mouse CD44 FITC (BD BioSciences) or  
574  $\alpha$ -mouse CD3 BV421 (BD BioSciences),  $\alpha$ -mouse CD4 BV-650 (Biolegend),  $\alpha$ -mouse Ly-6C  
575 APC-Cy7 (BD BioSciences) and  $\alpha$ -mouse CD44 FITC (BD BioSciences) for 30 min (each with  
576 1/300 dilution; 4°C). The cells were then stained with LIVE/DEAD fixable aqua  
577 (Invitrogen/Molecular Probes) to stain dead cells. Cells were washed with wash buffer and fixed  
578 with the Cytofix/Cytoperm Kit (BD Biosciences) for 20 min (room temperature). Intracellular  
579 staining was done with  $\alpha$ -mouse IL-2 APC (BD BioSciences),  $\alpha$ -mouse IFN- $\gamma$  PE-Cy7 (Biolegend)

580 and  $\alpha$ -mouse TNF- $\alpha$  PerCP-Cy5.5 (Biolegend), for 30 min (each with 1:300 dilution; 4°C). In  
581 some experiments samples are treated with Foxp3 Fixation / Permeabilization Buffer (ebioscience)  
582 and then stained with  $\alpha$ -mouse T-bet -BV786 (Biolegend) according to manufacturer's instruction.  
583 Cells were acquired on Symphony (BD Biosciences, USA) analyzer equipped with 350, 405, 445,  
584 488, 561, 638 and 785 nm LASER lines using DIVA software (v8). Data were analyzed with the  
585 FlowJo software version 9.9.6 (BD, San Jose CA). For analysis, first doublets were removed using  
586 width parameter; dead cells were excluded based on staining with the Live/Dead Aqua dye.  
587 Lymphocytes were identified according to their light-scattering properties. CD4<sup>+</sup> T-cells were  
588 identified as CD3<sup>+</sup> lymphocytes uniquely expressing CD4. Upon further gating intracellular  
589 cytokines were measured in CD44<sup>hi</sup>Ly-6C<sup>+</sup>T-bet<sup>+</sup> cells. Fluorescence minus one control was used  
590 for proper gating of positive events for designated cytokines.

591

#### 592 ***Immunosuppression by dexamethasone injection:***

593 To determine the safety of Centrin deficient *LmCen*<sup>-/-</sup> parasites in immune-suppressive condition,  
594 4 to 6 weeks old BALB/c mice were divided into three groups. Group-1 (n=6) were infected with  
595  $1 \times 10^6$  stationary phase *LmWT* parasites and Group-2 (n=6) and Group-3 (n=12) animals were  
596 immunized with  $1 \times 10^6$  stationary phase *LmCen*<sup>-/-</sup> parasites in a 10 $\mu$ l volume of PBS through  
597 intradermal (into the ear dermis) routes. After 10 weeks of post infection, only Group-3 animals  
598 were treated with 2 mg/kg Dexamethasone sodium phosphate (Sigma Aldrich) in PBS by  
599 subcutaneous injection three times for one week. Four weeks after this treatment (total 15 weeks  
600 post infection); all the groups were sacrificed and evaluated for parasite burden by serial dilution  
601 as described above. Development of pathology & lesion size in the ear was assessed at 15 weeks  
602 post infection by measuring the diameter of the lesion.

603 Characterization of *centrin* deleted parasites isolated from *LmCen*<sup>-/-</sup> plus DXM treated group was  
604 done by Polymerase chain reaction. Total Genomic DNA was isolated from the parasites recovered  
605 from *LmWT* and *LmCen*<sup>-/-</sup> plus DXM treated group according to the manufacturer information  
606 (DNeasy Blood & Tissue Kit, Qiagen). PCR was performed with *L. major centrin* gene specific  
607 primer (For-5'-ATGGCTGCGCTGACGGATGAACAGATTTCGC-3'; Rev-5'-  
608 CTTTCCACGCATCTGCAGCATCACGC-3') which target the amplification of the 450-bp. A  
609 reaction mixture was prepared containing 10 × Buffer (Invitrogen), 0.2 mmol/l each  
610 deoxyribonucleotide (Invitrogen), 1 μmol/l each primer, 1.25 units of Taq polymerase (Invitrogen)  
611 and 200 ng of DNA samples in a final volume of 50 μl. The PCR conditions were as follows:  
612 denaturation at 94°C for 3 min, followed by 35 cycles of 94°C for 20 s, 58°C for 20 s and 68°C  
613 for 35 s with a final extension of 68°C for 5 min. The amplification reactions were analyzed by  
614 1% agarose gel electrophoresis, followed by ethidium bromide staining and visualization under  
615 UV light. DNA from the reference plasmid (PCR 2.1 TOPO) containing *centrin* gene was used as  
616 a positive control.

617

### 618 ***Statistical analysis***

619 Statistical analysis of differences between means of groups was determined by unpaired two-  
620 tailed Student t test, using Graph Pad Prism 5.0 software. \*, <0.05; \*\* < 0.005; and \*\*\* <0.0005  
621 was considered significant.

622 ***Ethical Statement***

623 The animal protocol for this study has been approved by the Institutional Animal Care and Use  
624 Committee at the Center for Biologics Evaluation and Research, US FDA (ASP 1995#26). The  
625 animal protocol is in full accordance with "The guide for the care and use of animals as  
626 described in the US Public Health Service policy on Humane Care and Use of Laboratory  
627 Animals 2015". All animal studies at Ohio State University were performed in accordance  
628 with NIH guidelines for the humane care and use of animals and were approved by OSU  
629 IACUC. Animal experimental procedures performed at the National Institute of Allergy and  
630 Infectious Diseases (NIAID) were reviewed by the NIAID Animal Care and Use Committee  
631 under animal protocol LMVR4E. The NIAID DIR Animal Care and Use Program complies with  
632 the Guide for the Care and Use of Laboratory Animals and with the NIH Office of Animal Care  
633 and Use and Animal Research Advisory Committee guidelines. Detailed NIH Animal Research  
634 Guidelines can be accessed at <https://oma1.od.nih.gov/manualchapters/intramural/3040-2/>.  
635 Animal experimental procedures performed at Nagasaki University were approved by the  
636 Institutional Animal Research Committee of Nagasaki University (No.1606211317 and  
637 1505181227), the Nagasaki University Recombinant DNA Experiments Safety Committee (No.  
638 1403041262 and 1407221278), and performed according to Japanese law for the Humane  
639 Treatment and Management of Animals.

640

641

642

643

644 **References:**

- 645 1. Burza, S., Croft, S. L. & Boelaert, M. Leishmaniasis. *Lancet* **392**, 951–970 (2018).
- 646 2. Alvar, J. *et al.* Leishmaniasis worldwide and global estimates of its incidence. *PLoS One*  
647 **7**, e35671 (2012).
- 648 3. WHO. Leishmaniasis in high-burden countries: an epidemiological update based on data  
649 reported in 2014. *Relev. Epidemiol. Hebd.* (2016) doi:10.1186/1750-9378-2-15.Voir.
- 650 4. McCall, L. I., Zhang, W. W. & Matlashewski, G. Determinants for the Development of  
651 Visceral Leishmaniasis Disease. *PLoS Pathogens* vol. 9 (2013).
- 652 5. Matlashewski, G. *et al.* Research priorities for elimination of visceral leishmaniasis. *The*  
653 *Lancet Global Health* (2014) doi:10.1016/S2214-109X(14)70318-3.
- 654 6. Gillespie, P. M. *et al.* Status of vaccine research and development of vaccines for  
655 leishmaniasis. *Vaccine* **34**, 2992–2995 (2016).
- 656 7. Alvar, J. *et al.* Case study for a vaccine against leishmaniasis. *Vaccine* (2013)  
657 doi:10.1016/j.vaccine.2012.11.080.
- 658 8. Selvapandiyan, A. *et al.* Generation of growth arrested *Leishmania* amastigotes: A tool to  
659 develop live attenuated vaccine candidates against visceral leishmaniasis. *Vaccine* (2014)  
660 doi:10.1016/j.vaccine.2014.05.009.
- 661 9. Row, R. The curative value of *Leishmania* culture “vaccine” in oriental sore. *Br. Med. J.*  
662 **1**, 540 (1912).
- 663 10. Marzinowsky, E. I. Oriental sore and immunity against it. *Trans. R. Soc. Trop. Med. Hyg.*

- 664 (1924) doi:10.1016/S0035-9203(24)90754-1.
- 665 11. Khamesipour, A. *et al.* Leishmanization: Use of an old method for evaluation of candidate  
666 vaccines against leishmaniasis. *Vaccine* (2005) doi:10.1007/BF02809767.
- 667 12. Bogdan, C. Mechanisms and consequences of persistence of intracellular pathogens:  
668 Leishmaniasis as an example. *Cellular Microbiology* (2008) doi:10.1111/j.1462-  
669 5822.2008.01146.x.
- 670 13. Maspi, N., Abdoli, A. & Ghaffarifar, F. Pro- and anti-inflammatory cytokines in  
671 cutaneous leishmaniasis: a review. *Pathogens and Global Health* (2016)  
672 doi:10.1080/20477724.2016.1232042.
- 673 14. Hurdayal, R. & Brombacher, F. The role of IL-4 and IL-13 in cutaneous leishmaniasis.  
674 *Immunol. Lett.* (2014) doi:10.1016/j.imlet.2013.12.022.
- 675 15. Kaye, P. & Scott, P. Leishmaniasis: Complexity at the host-pathogen interface. *Nature*  
676 *Reviews Microbiology* (2011) doi:10.1038/nrmicro2608.
- 677 16. Coler, R. N. *et al.* Immunization with a polyprotein vaccine consisting of the T-cell  
678 antigens thiol-specific antioxidant, Leishmania major stress-inducible protein 1, and  
679 Leishmania elongation initiation factor protects against leishmaniasis. *Infect. Immun.*  
680 (2002) doi:10.1128/IAI.70.8.4215-4225.2002.
- 681 17. Jajarmi, V. *et al.* Immunization against Leishmania major infection in BALB/c mice using  
682 a subunit-based DNA vaccine derived from TSA, LmSTII, KMP11, and LACK  
683 predominant antigens. *Iran. J. Basic Med. Sci.* **22**, 1493–1501 (2019).

- 684 18. Gonzalo, R. M. *et al.* A heterologous prime-boost regime using DNA and recombinant  
685 vaccinia virus expressing the Leishmania infantum P36/LACK antigen protects BALB/c  
686 mice from cutaneous leishmaniasis. *Vaccine* (2002) doi:10.1016/S0264-410X(01)00427-  
687 3.
- 688 19. Zaph, C., Uzonna, J., Beverley, S. M. & Scott, P. Central memory T cells mediate long-  
689 term immunity to Leishmania major in the absence of persistent parasites. *Nat. Med.*  
690 (2004) doi:10.1038/nm1108.
- 691 20. Peters, N. C. *et al.* Vector transmission of Leishmania abrogates vaccine-induced  
692 protective immunity. *PLoS Pathog.* (2009) doi:10.1371/journal.ppat.1000484.
- 693 21. Darrah, P. A. *et al.* Multifunctional TH1 cells define a correlate of vaccine-mediated  
694 protection against Leishmania major. *Nat. Med.* (2007) doi:10.1038/nm1592.
- 695 22. Peters, N. C. *et al.* Chronic Parasitic Infection Maintains High Frequencies of Short-Lived  
696 Ly6C+CD4+ Effector T Cells That Are Required for Protection against Re-infection.  
697 *PLoS Pathog.* (2014) doi:10.1371/journal.ppat.1004538.
- 698 23. Hohman, L. S. & Peters, N. C. CD4+ T Cell-Mediated Immunity against the Phagosomal  
699 Pathogen Leishmania: Implications for Vaccination. *Trends in Parasitology* (2019)  
700 doi:10.1016/j.pt.2019.04.002.
- 701 24. Selvapandiyan, A. *et al.* Centrin gene disruption impairs stage-specific basal body  
702 duplication and cell cycle progression in Leishmania. *J. Biol. Chem.* (2004)  
703 doi:10.1074/jbc.M402794200.



- 704 25. Selvapandiyan, A. *et al.* Centrin1 is required for organelle segregation and cytokinesis in  
705 Trypanosoma brucei. *Mol. Biol. Cell* (2007) doi:10.1091/mbc.E07-01-0022.
- 706 26. Selvapandiyan, A. *et al.* Intracellular Replication-Deficient Leishmania donovani Induces  
707 Long Lasting Protective Immunity against Visceral Leishmaniasis. *J. Immunol.* (2009)  
708 doi:10.4049/jimmunol.0900276.
- 709 27. Fiuza, J. A. *et al.* Induction of immunogenicity by live attenuated Leishmania donovani  
710 centrin deleted parasites in dogs. *Vaccine* (2013) doi:10.1016/j.vaccine.2013.01.048.
- 711 28. Dey, R. *et al.* Characterization of Cross-Protection by Genetically Modified Live-  
712 Attenuated *Leishmania donovani* Parasites against *Leishmania mexicana*. *J. Immunol.*  
713 (2014) doi:10.4049/jimmunol.1303145.
- 714 29. Gannavaram, S. *et al.* Methods to evaluate the preclinical safety and immunogenicity of  
715 genetically modified live-attenuated Leishmania parasite vaccines. in *Methods in*  
716 *Molecular Biology* (2016). doi:10.1007/978-1-4939-3387-7\_35.
- 717 30. Banerjee, A. *et al.* Live Attenuated *Leishmania donovani* Centrin Gene–Deleted Parasites  
718 Induce IL-23–Dependent IL-17–Protective Immune Response against Visceral  
719 Leishmaniasis in a Murine Model. *J. Immunol.* (2017) doi:10.4049/jimmunol.1700674.
- 720 31. Fiuza, J. A. *et al.* Vaccination using live attenuated Leishmania donovani centrin deleted  
721 parasites induces protection in dogs against Leishmania infantum. *Vaccine* (2015)  
722 doi:10.1016/j.vaccine.2014.11.039.
- 723 32. Zhang, W. W. & Matlashewski, G. CRISPR-Cas9-mediated genome editing in

- 724            *Leishmania donovani*. *MBio* **6**, e00861-15 (2015).
- 725    33.    Zhang, W.-W., Lypaczewski, P. & Matlashewski, G. Optimized CRISPR-Cas9 Genome  
726            Editing for *Leishmania* and Its Use To Target a Multigene Family, Induce Chromosomal  
727            Translocation, and Study DNA Break Repair Mechanisms. *mSphere* (2017)  
728            doi:10.1128/mSphere.00340-16.
- 729    34.    Zhang, W.-W., Lypaczewski, P. & Matlashewski, G. Application of CRISPR-Cas9  
730            Mediated Genome Editing in *Leishmania*. in *Methods in Molecular Biology* (eds. Ginger,  
731            M., Zilberstein, D. & Michels, P.) (Springer Nature, 2019).
- 732    35.    Selvapandiyan, A. *et al.* Expression of a Mutant Form of *Leishmania donovani* Centrin  
733            Reduces the Growth of the Parasite. *J. Biol. Chem.* (2001) doi:10.1074/jbc.M106806200.
- 734    36.    Zhang, W. W., Charest, H. & Matlashewski, G. The expression of biologically active  
735            human p53 in *Leishmania* cells: A novel eukaryotic system to produce recombinant  
736            proteins. *Nucleic Acids Res.* (1995) doi:10.1093/nar/23.20.4073.
- 737    37.    Zhang, W. W. & Matlashewski, G. Screening *Leishmania donovani*-specific genes  
738            required for visceral infection. *Mol. Microbiol.* **77**, 505–517 (2010).
- 739    38.    Peters, N. C. *et al.* Evaluation of Recombinant *Leishmania* Polyprotein Plus  
740            Glucopyranosyl Lipid A Stable Emulsion Vaccines against Sand Fly-Transmitted  
741            *Leishmania major* in C57BL/6 Mice. *J. Immunol.* (2012) doi:10.4049/jimmunol.1201676.
- 742    39.    Gannavaram, S. *et al.* Whole genome sequencing of live attenuated *Leishmania donovani*  
743            parasites reveals novel biomarkers of attenuation and enables product characterization.

- 744 *Sci. Rep.* **7**, (2017).
- 745 40. Medeiros, L. C. S. *et al.* Rapid, selection-free, high-efficiency genome editing in  
746 protozoan parasites using CRISPR-cas9 ribonucleoproteins. *MBio* (2017)  
747 doi:10.1128/mBio.01788-17.
- 748 41. Gomes, R. *et al.* KSAC, a defined Leishmania antigen, plus adjuvant protects against the  
749 virulence of *L. major* transmitted by its natural vector *Phlebotomus duboscqi*. *PLoS Negl.*  
750 *Trop. Dis.* (2012) doi:10.1371/journal.pntd.0001610.
- 751 42. Rogers, M. E., Sizova, O. V., Ferguson, M. A. J., Nikolaev, A. V. & Bates, P. A.  
752 Synthetic Glycovaccine Protects against the Bite of Leishmania- Infected Sand Flies . *J.*  
753 *Infect. Dis.* (2006) doi:10.1086/505584.
- 754 43. Titus, R. & Ribeiro, J. Salivary gland lysates from the sand fly *Lutzomyia longipalpis*  
755 enhance Leishmania infectivity. *Science (80-. )*. **239**, 1306–1308 (1988).
- 756 44. Rogers, M. E., Ilg, T., Nikolaev, A. V., Ferguson, M. A. J. & Bates, P. A. Transmission of  
757 cutaneous leishmaniasis by sand flies is enhanced by regurgitation of fPPG. *Nature* **430**,  
758 463–467 (2004).
- 759 45. Peters, N. C. *et al.* In vivo imaging reveals an essential role for neutrophils in  
760 leishmaniasis transmitted by sand flies. *Science (80-. )*. **321**, 970–974 (2008).
- 761 46. Fiuza, J. A. *et al.* Intradermal Immunization of *Leishmania donovani* Centrin Knock-Out  
762 Parasites in Combination with Salivary Protein LJM19 from Sand Fly Vector Induces a  
763 Durable Protective Immune Response in Hamsters. *PLoS Negl. Trop. Dis.* (2016)

- 764 doi:10.1371/journal.pntd.0004322.
- 765 47. Glennie, N. D. *et al.* Skin-resident memory CD4+ T cells enhance protection against  
766 Leishmania major infection. *J. Exp. Med.* **212**, 1405–1414 (2015).
- 767 48. Scott, P. & Novais, F. O. Cutaneous leishmaniasis: Immune responses in protection and  
768 pathogenesis. *Nature Reviews Immunology* vol. 16 581–592 (2016).
- 769 49. Gomes, R. *et al.* Immunity to sand fly salivary protein LJM11 modulates host response to  
770 vector-transmitted leishmania conferring ulcer-free protection. *J. Invest. Dermatol.* **132**,  
771 2735–2743 (2012).
- 772 50. Li, H. Aligning sequence reads, clone sequences and assembly contigs with BWA-MEM.  
773 **arXiv:1303**, (2013).
- 774 51. Li, H. *et al.* The Sequence Alignment/Map format and SAMtools. *Bioinformatics* **25**,  
775 2078–2079 (2009).
- 776 52. Quinlan, A. R. & Hall, I. M. BEDTools: A flexible suite of utilities for comparing  
777 genomic features. *Bioinformatics* **26**, 841–842 (2010).
- 778 53. Aslett, M., Aurrecochea, C., Berriman, M. & Al., E. TriTrypDB: a functional genomic  
779 resource for the Trypanosomatidae. *Nucleic Acids Res.* **38**, D457-62 (2010).
- 780 54. Kamhawi, S., Belkaid, Y., Modi, G., Rowton, E. & Sacks, D. Protection against cutaneous  
781 leishmaniasis resulting from bites of uninfected sand flies. *Science (80-. )*. (2000)  
782 doi:10.1126/science.290.5495.1351.

783

784 **Acknowledgments:**

785 **Funding:** Funding was provided from the Global Health Innovative Technology Fund, the  
786 Canadian Institutes of Health Research (to GM), intramural funding from CBER, FDA (to HLN),  
787 and the Fonds de recherche du Québec – Santé (to PL). The findings of this study are an informal  
788 communication and represent the authors' own best judgments. These comments do not bind or  
789 obligate the Food and Drug Administration.

790

791 **Author contributions:** WWZ, SG, RD, SK, MS and SS designed and conducted experiments,  
792 analyzed data and helped write the manuscript. GM, HLN, AS, SH, SK, JGV designed  
793 experiments, analyzed data and wrote the manuscript. PL analyzed genome data and helped write  
794 the manuscript. NI, AS, VS, FO, IVC, TS, CM, AM, RN, NS, GV conducted experiments,  
795 analyzed data and reviewed the manuscript.

796

797 **Data availability statement:** The data that support the findings of this study are available from  
798 the corresponding author upon reasonable request.

799

800 **Competing interests:** The FDA is currently a co-owner of two US patents that claim attenuated  
801 *Leishmania* species with the Centrin gene deletion (US7,887,812 and US 8,877,213). All other  
802 authors declare they have no competing interests.

803

804 **Materials & Correspondence.** Correspondence and requests for material should be addressed to

805 G.M. ([greg.matlashewski@mcgill.ca](mailto:greg.matlashewski@mcgill.ca)) , or H.N. ([Hira.Nakhasi@fda.hhs.gov](mailto:Hira.Nakhasi@fda.hhs.gov)), or A.S.

806 ([Abhay.Satoskar@osumc.edu](mailto:Abhay.Satoskar@osumc.edu)).

807

808

809

810 **Figures**

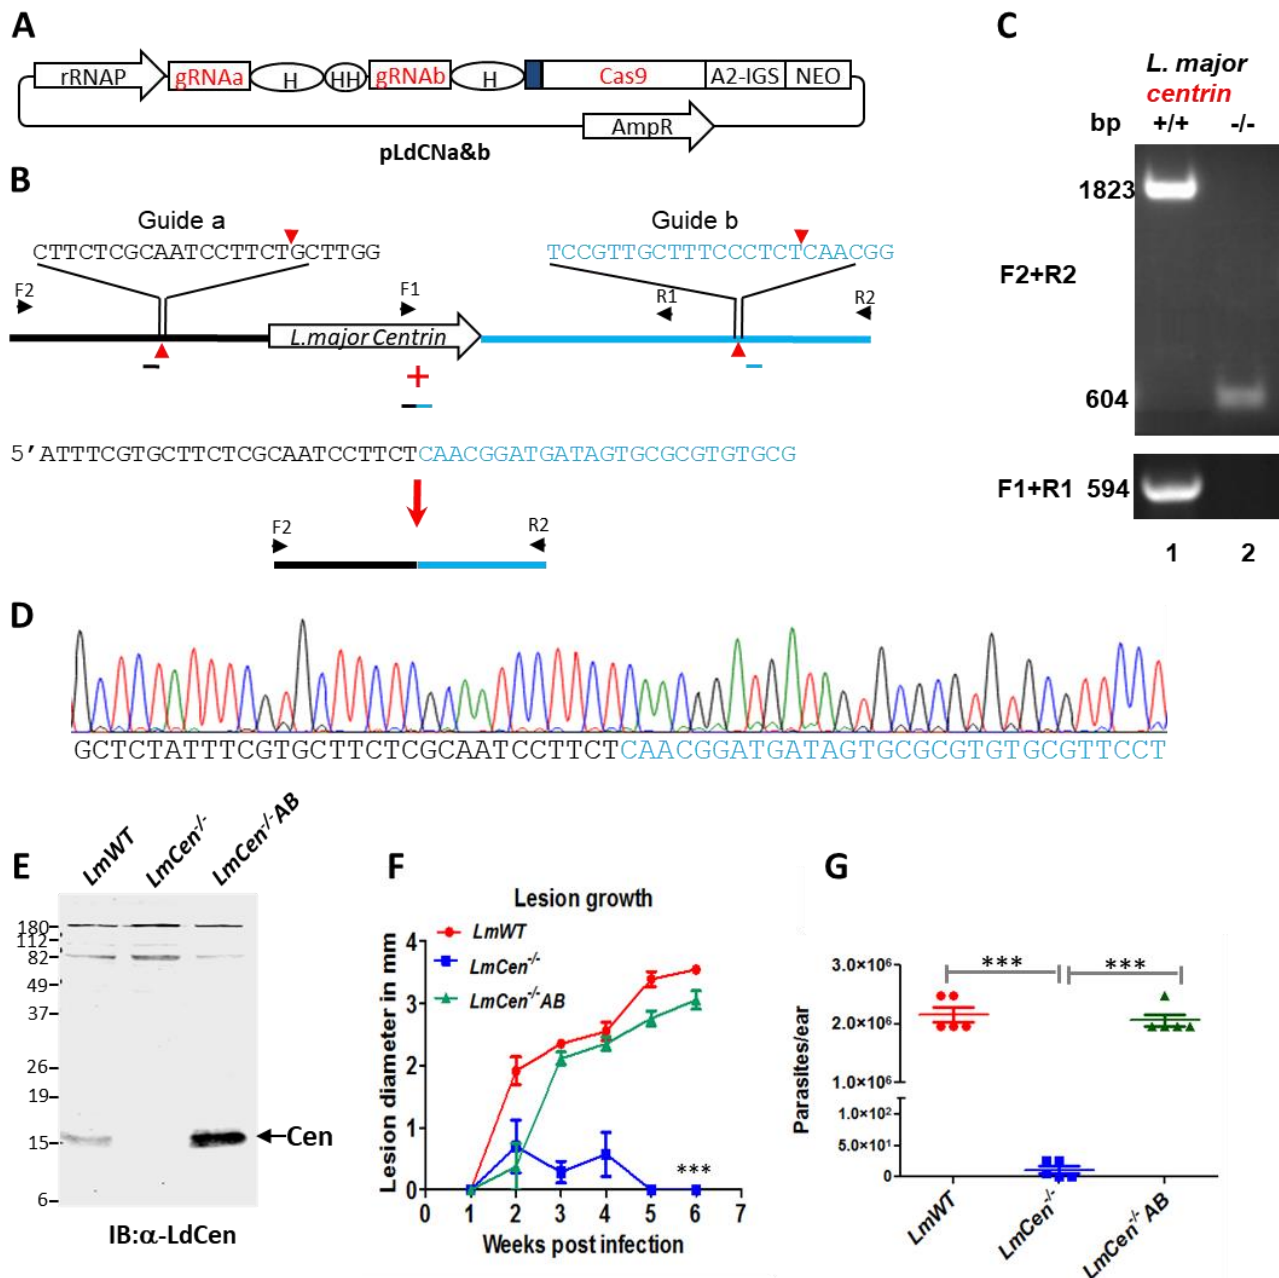

811

812 **Figure 1: Generation of marker free *LmCen*<sup>-/-</sup> parasite. Strategy for the generation of *centrin*-**  
 813 **deficient *L. major* using CRISPR-Cas9.**

814 **A.** The pLdCN vector used to express Cas9 and gRNAa and gRNAb in *Leishmania*. A2-IGS, *L.*  
 815 *donovani* A2 gene intergenic sequence; rRNAP, *L. donovani* ribosomal RNA promoter; H,

816 Hepatitis delta virus ribozyme; HH, Hammerhead ribozyme. **B.** Schematic of gene deletion  
817 strategy showing gRNAa and gRNAb targeting sites in the *L. major centrin* gene locus and the  
818 expected gene deletion sequence after transfection of the cells with a 50 nucleotide oligonucleotide  
819 donor (18). The primers F1-R1 and F2-R2 used to detect this deletion are indicated. **C.** PCR  
820 analysis with primers F1-R1 and F2-R2 revealing loss of the *centrin* gene. Lane 1, Wildtype *L.*  
821 *major*; lane 2, *L. major centrin* null mutant. **D.** Sequence analysis confirming the flanking DNA  
822 breaks joined together by the transfected 50 nucleotide oligonucleotide donor. See the  
823 supplementary information for the detailed sequence. **E.** An immunoblot with an  $\alpha$ -LdCentrin  
824 antibody showing the re-expression of Centrin in *LmCen*<sup>-/-</sup> parasites transfected with a pKSNeo-  
825 LmCEN plasmid (*LmCen*<sup>-/-</sup>-AB, Addback). **F.** *LmCen*<sup>-/-</sup> was unable to induce ear cutaneous lesions  
826 in C57BL/6 mice compared to wildtype *L. major* or the centrin add-back parasites of *LmCen*<sup>-/-</sup>  
827 showing restored virulence (green line). C57BL/6 mice (n=5 per group) were infected  
828 intradermally ( $1 \times 10^6$ ) with *LmWT*, *LmCen*<sup>-/-</sup> or *LmCen*<sup>-/-</sup>AB parasites and the ear lesion  
829 development was monitored weekly. **G.** Parasite load in the infected ears of the mice. Parasite  
830 burden was determined by limiting dilution assay. Statistical analysis was performed by unpaired  
831 two-tailed t-test (\*\*\*)p<0.0001).  
832



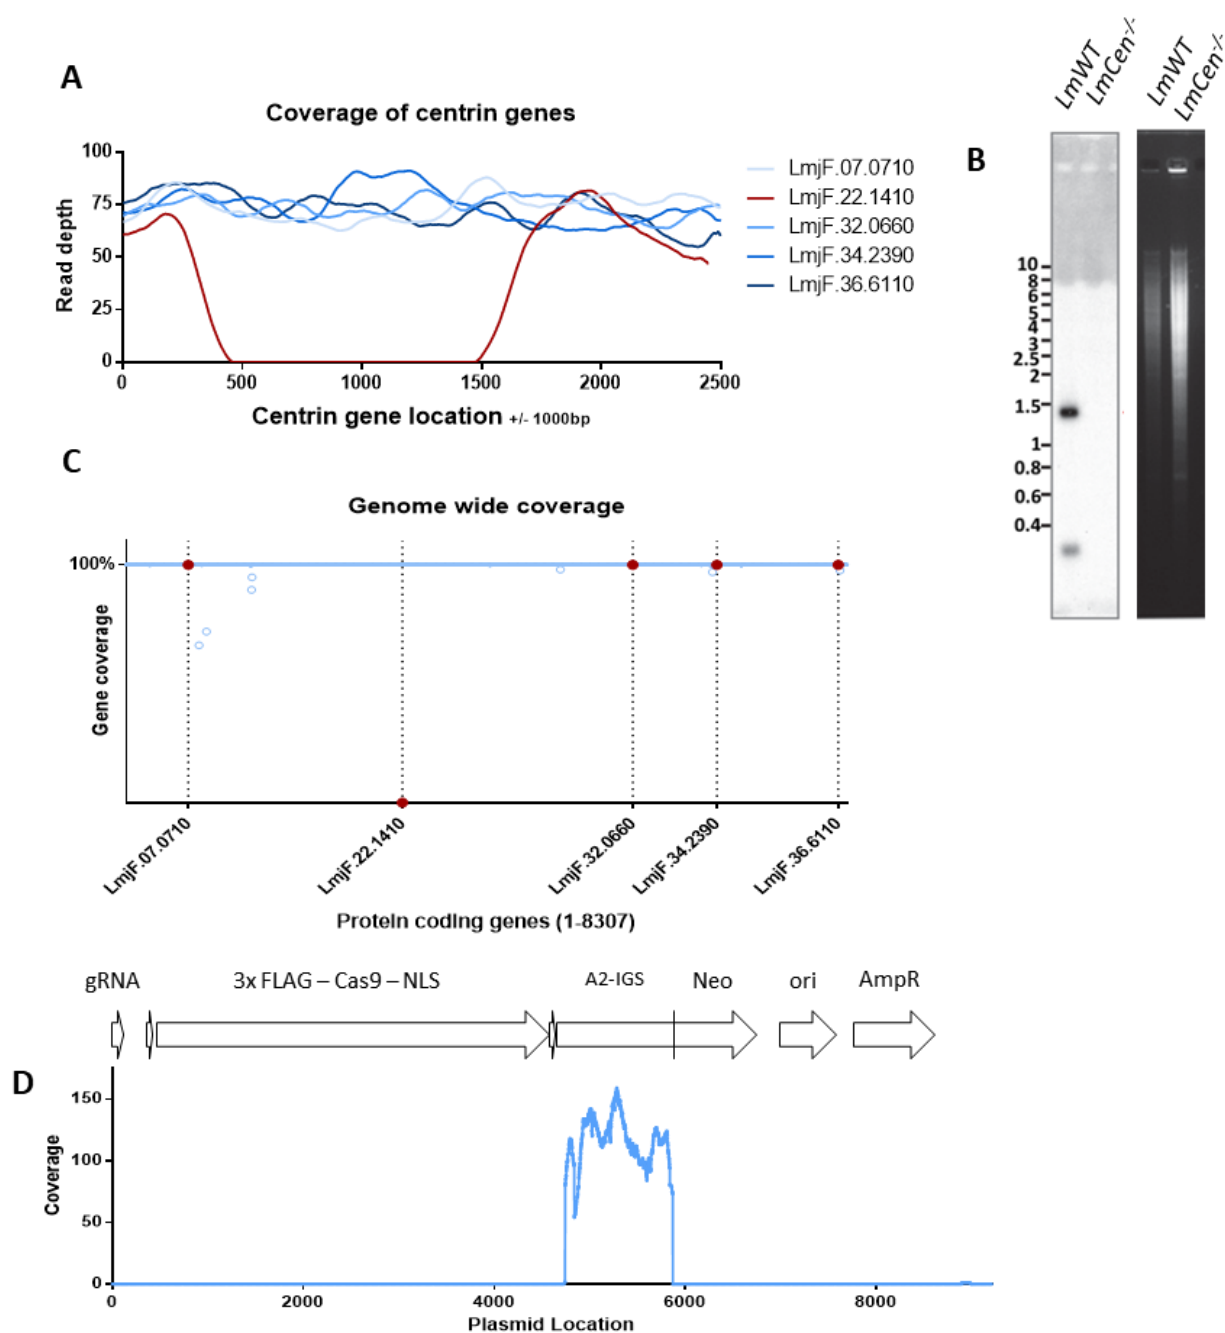

833

834 **Figure 2: Whole genome analysis of the attenuated *LmCen*<sup>-/-</sup> *L. major*.**

835 **A.** Sequence coverage across each of the *centrin* gene family members in the *LmCen*<sup>-/-</sup> *L. major*.

836 Note that only the targeted LmjF.22.1410 *centrin* gene has no sequence reads resulting from

837 CRISPR gene editing. **B.** Southern blot analysis revealing the absence of the LmjF.22.1410  
838 *centrin* gene in the genome of *LmCen*<sup>-/-</sup> parasite compared to wildtype *L. major*, *LmWT*. **C.**  
839 Percent sequence coverage (Y-axis) for all protein coding genes from chromosome 1 to 36 (X-  
840 axis) by Illumina sequencing of the whole genome of the *LmCen*<sup>-/-</sup> *L. major*. The blue line across  
841 the X axis is composed of 8307 dots where each dot represents a gene starting from chromosome  
842 1 (left) to chromosome 36 (right) and is placed according to the portion of the open reading  
843 frame supported by sequencing reads. Open blue circles indicate genes where misalignments of  
844 sequencing Illumina reads occurred for some multicopy genes, although these genes were  
845 verified to be intact. Red circles and line markers correspond to the 5 *centrin* genes across the  
846 genome in chromosomes 7, 22, 32, 34 and 36. Only the targeted *centrin* gene (LmjF.22.1410)  
847 has been deleted from the genome and therefore has 0% coverage. **D.** Coverage of the pLdCN  
848 CRISPR plasmid sequence generated from whole genome sequencing. No homologous plasmid  
849 sequences were detected in the *LmCen*<sup>-/-</sup> genome except for the positions ~5000 to ~6000  
850 correspondings to the *Leishmania donovani* A2 gene intergenic sequence (A2-IGS) that were  
851 incorporated into the pLdCN plasmid for expression of the *Neo*<sup>R</sup> gene. Therefore, the A2-IGS  
852 genomic sequence reads can align to this portion of the plasmid although the pLdCN CRISPR  
853 plasmid is not present in *LmCen*<sup>-/-</sup>.

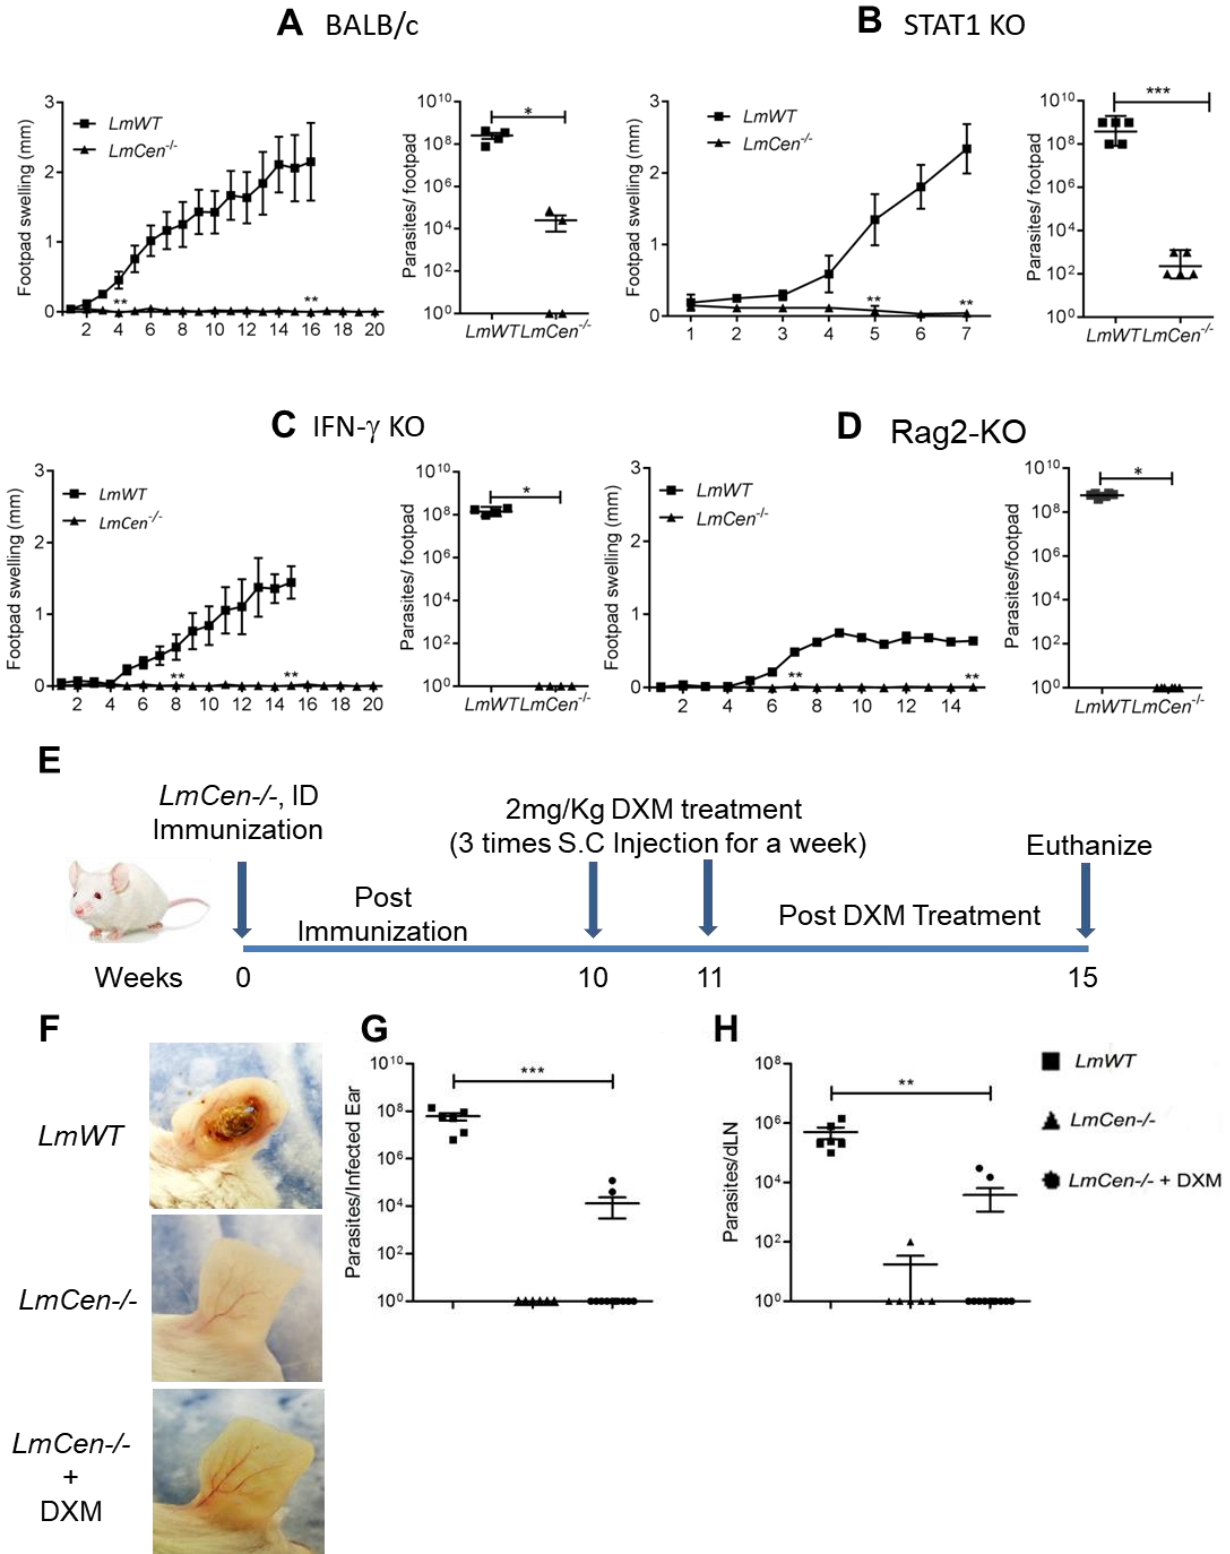

854

855 **Figure 3: Safety and non-pathogenicity characteristics of *LmCen*<sup>-/-</sup> parasites.**

856 **A**, BALB/c; **B**, STAT1 KO; **C**, IFN- $\gamma$  KO and **D**, Rag2 KO mice were subcutaneously inoculated  
857 with indicated doses of *LmWT* or *LmCen*<sup>-/-</sup> into the right hind footpad. **A**, **C**, **D**, BALB/c (n=4),  
858 IFN- $\gamma$  KO (n=5) and Rag2 KO (n=6) mice were infected with  $1 \times 10^7$  of *LmWT* (Friedlin V9) or  
859 *LmCen*<sup>-/-</sup>, and **(B)** STAT1 KO (n=5) mice were infected with  $2 \times 10^8$  of *LmWT* (Friedlin V9) or  
860 *LmCen*<sup>-/-</sup>. Following infection, footpad swelling was measured weekly by digital caliper. Parasite  
861 burden in infected footpad was measured at 5 weeks after infection in BALB/c, at 7 weeks in  
862 STAT1 KO or at 15 weeks in IFN- $\gamma$  KO and Rag2 KO. For the lesion development studies shown  
863 in A-D (left panels), asterisks represent the first time point at which significant differences were  
864 observed between the *LmWT* and *LmCen*<sup>-/-</sup> groups. The differences in footpad swelling were  
865 statistically significant at all time points after the initial observation of the lesion. **E**, Schematic  
866 representation of the DXM treatment: BALB/c mice were divided into three groups. Groups-1  
867 (n=6 mice/group) were infected with intradermal injection of  $10^6$  total stationary phase *L. major*  
868 wildtype (*LmWT*) promastigotes in the ear dermis. Groups-2 (n=6 mice/group) and group-3 (n=12  
869 mice/group) received an intradermal immunization of  $1 \times 10^6$  total stationary phase *centrin* deleted  
870 *L. major* (*LmCen*<sup>-/-</sup>) promastigotes in the ear dermis. Ten weeks post inoculation, only the third  
871 group was treated with 2 mg/kg DXM over one week by 3 subcutaneous injections. All three  
872 groups of animals were euthanized four weeks after DXM treatment (total 15 weeks post  
873 infection). **F**, Photographs of representative ear of *LmWT* infected (Group1) and *LmCen*<sup>-/-</sup> (Group2)  
874 (*LmCen*<sup>-/-</sup>+DXM) (group3) mice. Compared to *LmWT* group which develops severe pathology in  
875 the ear, *LmCen*<sup>-/-</sup> ( $\pm$ DXM) immunized mice display no ear pathology. **G** and **H**, Scatter dot plot of  
876 parasite load in infected ear (**G**) and draining lymph node (dLN) (**H**) of each *LmWT* and *LmCen*<sup>-/-</sup>  
877 ( $\pm$ DXM) immunized mice. Parasite burden was determined by limiting dilution assay. Results

878 represent data pooled from two independent experiments with (n=3-6 mice per group each time).

879 Statistical analysis was performed by unpaired two-tailed t-test (\*\*p < 0.004, \*\*\*p < 0.0006).

880

881

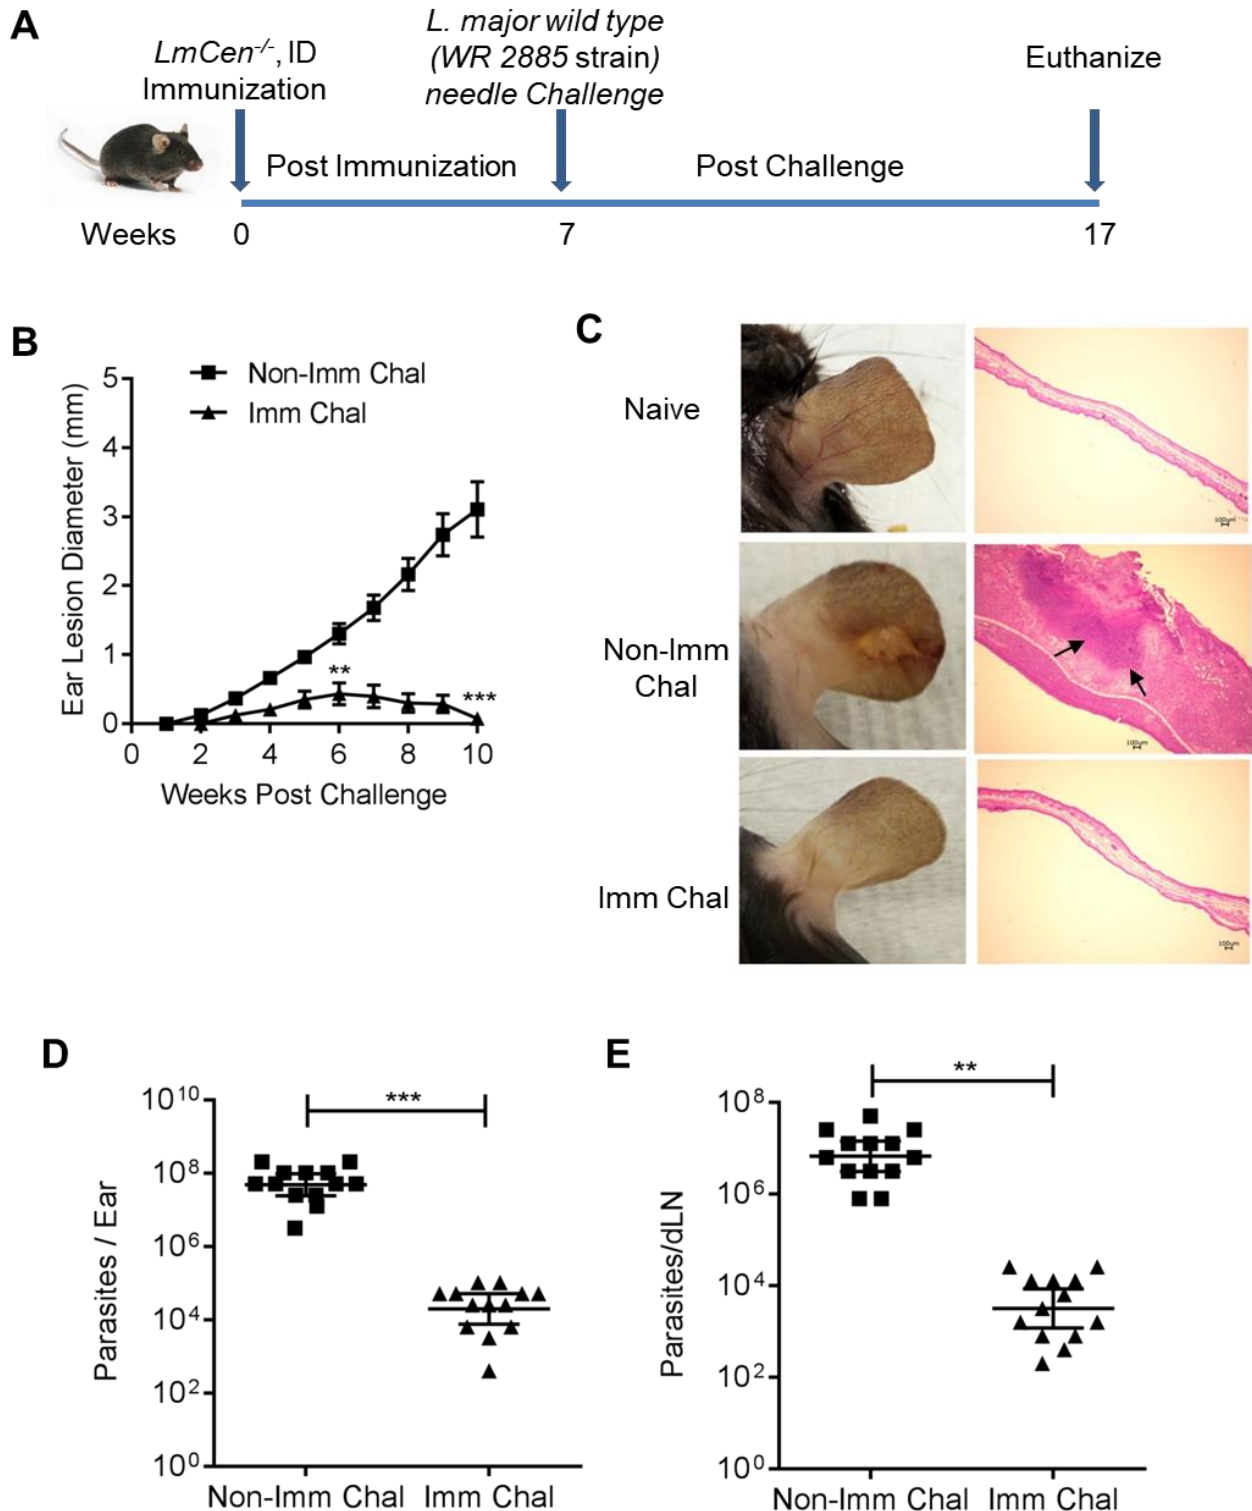

882

883 **Figure 4: Protective efficacy of *LmCen<sup>-/-</sup>* parasites against virulent *L. major* needle challenge**

884 **in C57BL/6 mice.** **A.** Schematic representation of the needle challenge procedure. Mice were  
885 immunized by intradermal injection in the left ear dermis with  $1 \times 10^6$  stationary phase *centrin*  
886 deleted *L. major* (*LmCen*<sup>-/-</sup>) promastigotes. Seven weeks post-immunization, both immunized and  
887 age matched naïve animals were challenged with 750 metacyclic *L. major* wildtype parasites in  
888 the right ear by intradermal injection. All the animals were euthanized after 10 weeks post  
889 challenge as shown in the figure. **B.** Ear lesion size was measured weekly for both *LmCen*<sup>-/-</sup>  
890 immunized (Imm Chal) and non-immunized (Non-Imm Chal) mice after intradermal challenge  
891 with *LmWT* parasites. Results are mean  $\pm$  SEM. For the lesion development studies shown in B,  
892 asterisks represent the first time point at which significant differences were observed between  
893 immunized (Imm Chal) and non-immunized (Non-Imm Chal) mice. The differences in ear lesion  
894 diameter were statistically significant at all time points after the initial observation of the lesion.  
895 **C.** Photographs (left panel) & histology (H&E stained, right panel) of representative challenged  
896 ear of *LmCen*<sup>-/-</sup> immunized (Imm Chal) & non-immunized (Non-Imm Chal) mice after 10 weeks  
897 post challenge. Arrow indicates inflammatory cells recruited area. **D** and **E**, Scatter dot plot of  
898 parasite load of challenged ear (**D**) and draining lymph node (**E**) of each *LmCen*<sup>-/-</sup> immunized  
899 (Imm Chal) & non-immunized (Non-Imm chal) mice. Parasite burden was determined by limiting  
900 dilution assay. Results are mean  $\pm$  SEM. Data are pooled from two independent experiments (n =  
901 13 per group). Statistical analysis was performed by unpaired two-tailed t-test (\*\*p < 0.001,  
902 \*\*\*p < 0.0002).

903  
904

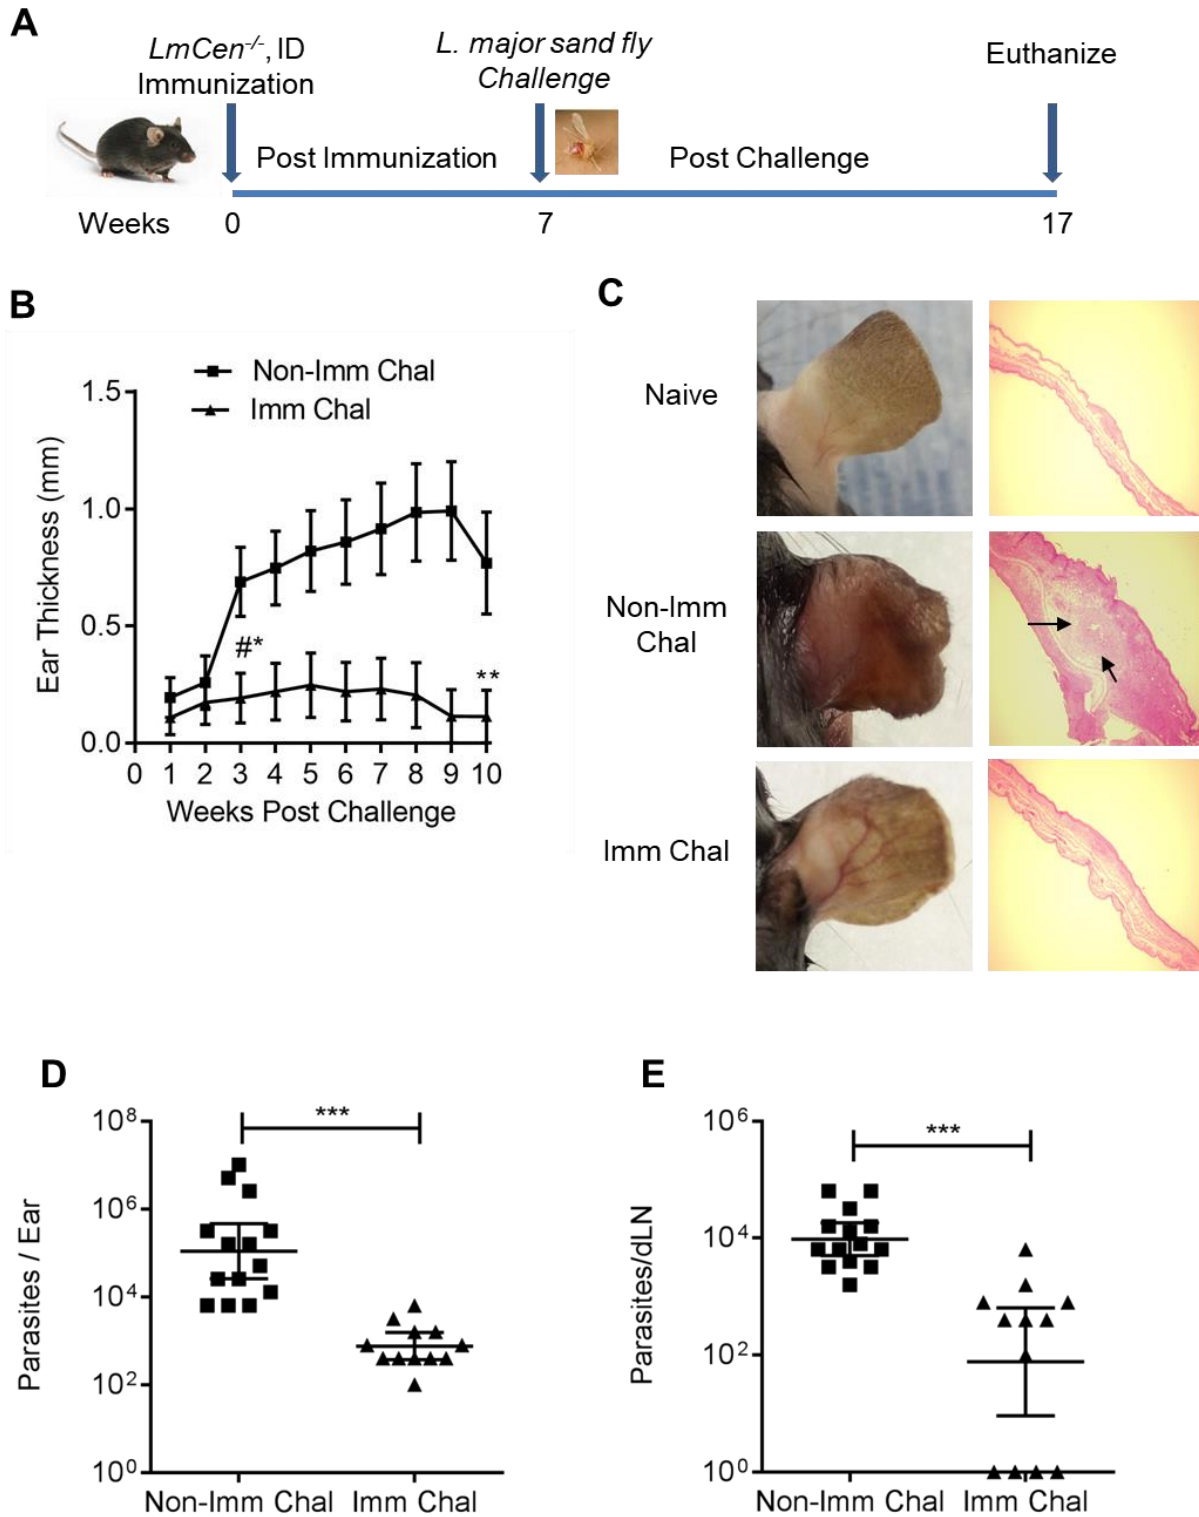

905

906 **Figure 5: Protective efficacy of *LmCen<sup>-/-</sup>* parasites against sand fly challenge in C57BL/6**



907 **mice. A.** Schematic representation of the sand fly challenge procedure. Mice were immunized by  
908 intradermal injection in the left ear dermis with  $1 \times 10^6$  stationary phase *centrin* deleted *L. major*  
909 (*LmCen*<sup>-/-</sup>) promastigotes. Seven weeks post-immunization, both immunized and age matched  
910 naïve animals were challenged with ten *L. major* (WR 2855 strain) infected sand flies in the right  
911 ear. All the animals were euthanized after 10 weeks post challenge as shown in the Figure. **B.** Ear  
912 lesion thickness was measured weekly for both *LmCen*<sup>-/-</sup> immunized (Imm Chal) and non-  
913 immunized (Non-Imm Chal) mice after sand fly transmission. only 1 mouse out of 12 *LmCen*<sup>-/-</sup>  
914 immunized-challenged has developed severe lesion. For the lesion development studies shown in  
915 B, asterisks represent the first time point at which significant differences were observed between  
916 immunized (Imm Chal) and non-immunized (Non-Imm Chal) mice. The differences in ear lesion  
917 diameter were statistically significant at all time points after the initial observation of the lesion.  
918 **C.** Photographs (left panel) & histology (H&E staining right panel) of representative challenged  
919 ear of *LmCen*<sup>-/-</sup> immunized (Imm Chal) & non-immunized (Non-Imm Chal) mice after 10 weeks  
920 post challenge. Arrow indicates inflammatory cells recruited area. Results are mean± SEM. **D** and  
921 **E,** Scatter dot plot of parasite load of challenged ear (**D**) and draining lymph node (**E**) of each  
922 *LmCen*<sup>-/-</sup> immunized (Imm Chal) & non-Immunized (Non-Imm chal) mice. Parasite burden was  
923 determined by limiting dilution assay. Results are geometric means with 95% CI of total 12-14  
924 mice in each group. Data are pooled from two independent experiment. Statistical analysis was  
925 performed by Mann-Whitney two-tailed test (\* p<0.05; \*\* p<0.01; \*\*\*p<0.0001).

926

927

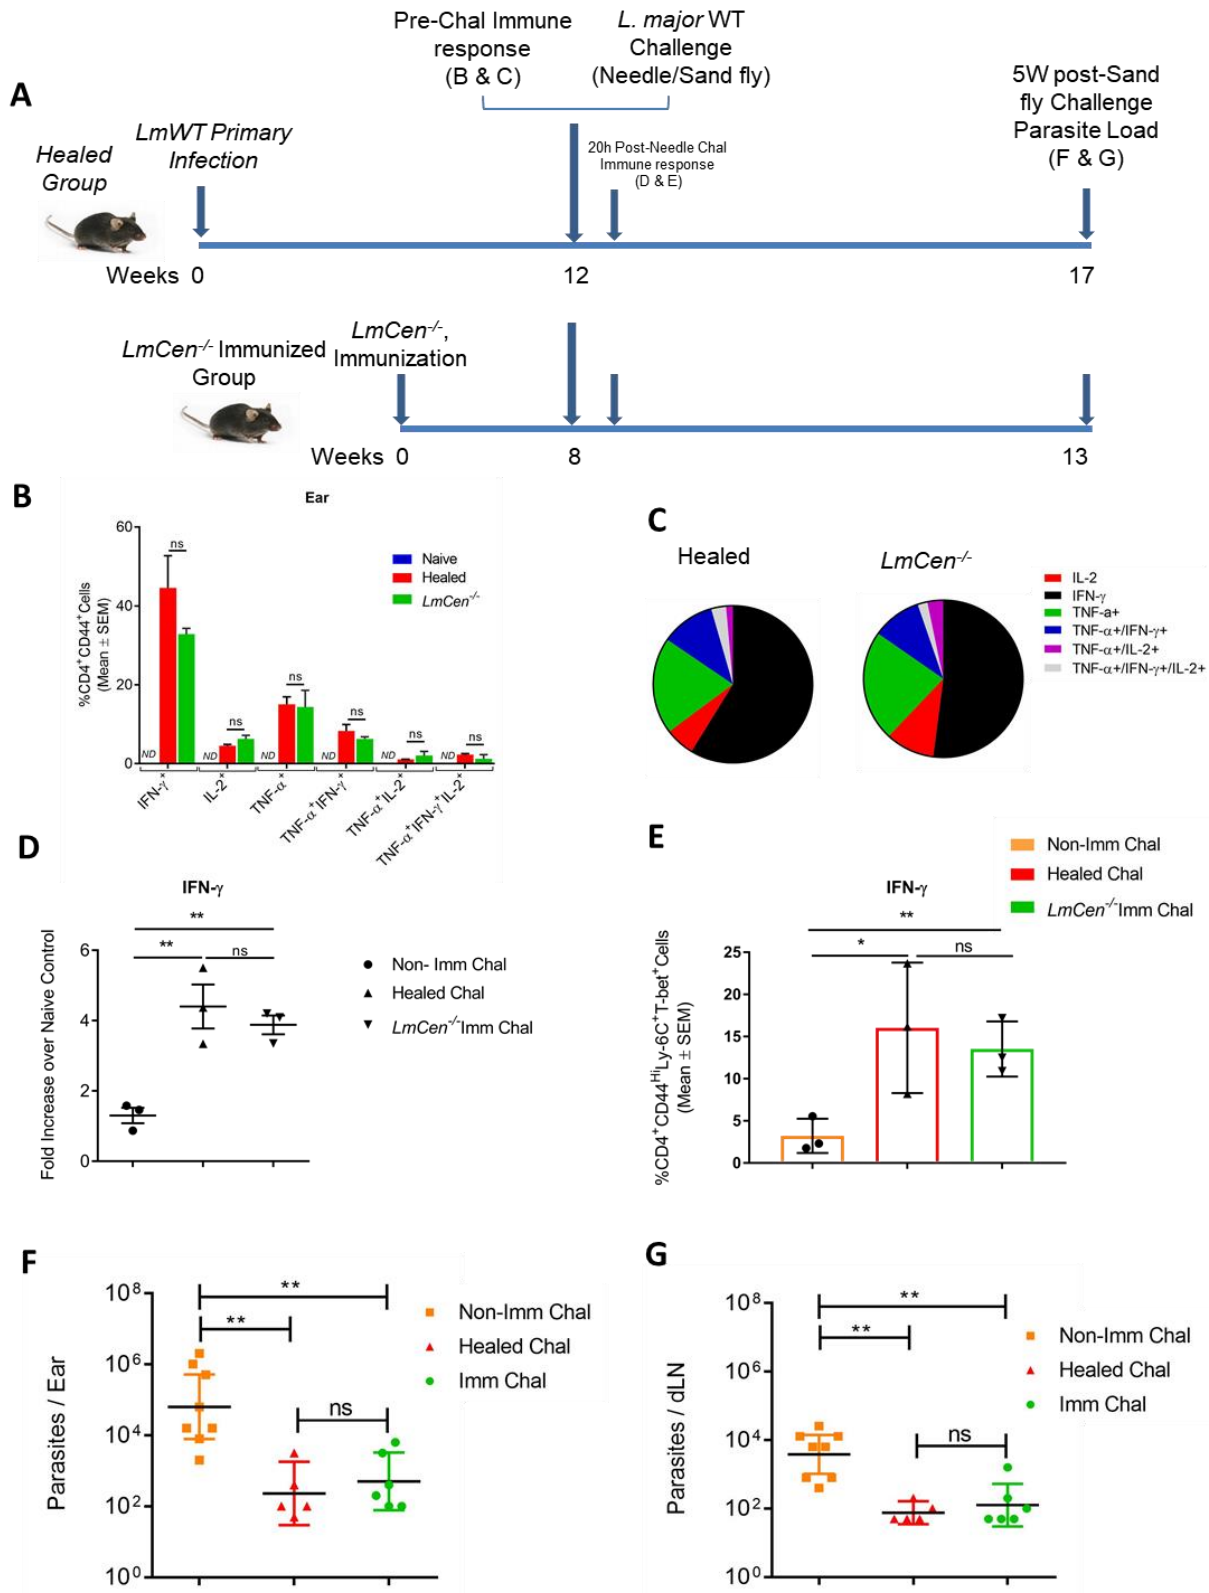

928

929 **Figure 6: *LmCen*<sup>-/-</sup> immunization or leishmanization with *LmWT* mediates comparable host**

930 **protection against wildtype *L. major* infection. A.** Schematic representation of the experimental  
931 approach used to comparative the protective immune response following leishmanization (healed)  
932 immunization with *LmCen*<sup>-/-</sup>. To determine comparative immune response between leishmanized  
933 and *LmCen*<sup>-/-</sup> immunized mice (Fig. 6 B and C), C57BL/6 mice were either injected intradermally  
934 with  $1 \times 10^4$  metacyclic *LmWT* (Week-0) or  $1 \times 10^6$  total stationary phase *LmCen*<sup>-/-</sup> parasites  
935 (Week-0) and a comparative immune response between healed from primary *LmWT* infection  
936 (Leishmanized) at week 12 and *LmCen*<sup>-/-</sup> immunized mice at week 8 was determined. Naïve  
937 controls mice were not immunized with *LmCen*<sup>-/-</sup> or not infected with *LmWT*. To determine the  
938 20h post challenge immune response, healed, *LmCen*<sup>-/-</sup> immunized as well as age matched naïve  
939 control mice were needle challenged with  $1 \times 10^5$  metacyclic *L. major* wildtype (*LmWT*) parasites  
940 in the contralateral ear (12 and 8 weeks respectively) (Fig. 6 D and E). To determine the protective  
941 response, healed, *LmCen*<sup>-/-</sup> immunized and age matched naïve control mice (Fig. 6 F and G) were  
942 challenged with ten *L. major* infected sand flies in the right ear. All the animals were euthanized  
943 after 5 weeks post sand fly challenge (week 17 for leishmanized and weeks 13 for naïve control  
944 and *LmCen*<sup>-/-</sup> immunized groups) and parasite load were determined. **B.** Multiparameter analysis  
945 for single, double or triple cytokine secreting CD3<sup>+</sup>CD4<sup>+</sup>CD44<sup>+</sup> T cells after 20 hours of *in-vitro*  
946 re-stimulation with freeze-thaw *L. major* antigen (*LmFTAg*) from pooled ears (2 ears) of naïve  
947 control, healed and *LmCen*<sup>-/-</sup> immunized group of mice plus naive splenic APCs. Results (mean  $\pm$   
948 SEM) are representative of one independent experiment with 2-3 mice per group. Statistical  
949 analysis was performed by unpaired two-tailed t-test. **C.** Results were also represented in the Pie  
950 charts to show the cytokine profile of CD3<sup>+</sup>CD4<sup>+</sup>CD44<sup>+</sup> T cells in response to *LmFTAg* re-  
951 stimulation expressing any one cytokine (in red- IL-2, in black- IFN- $\gamma$  and in green- TNF- $\alpha$ ), any  
952 two cytokines (in violet – TNF- $\alpha$ <sup>+</sup>IL-2<sup>+</sup> and in blue- TNF- $\alpha$ <sup>+</sup>IFN- $\gamma$ <sup>+</sup>), all three cytokines (in gray-

953 IL-2<sup>+</sup>TNF- $\alpha$ <sup>+</sup>IFN- $\gamma$ <sup>+</sup>). The data presented are representative of single experiments. Mean and SEM  
954 of three mice in each group are shown. ns, p> 0.2. **D.** Ear IFN- $\gamma$  expression were measured by RT-  
955 PCR analysis from healed, *LmCen*<sup>-/-</sup> immunized and age matched naïve control mice following  
956 20h post needle challenge with wildtype *L. major*-parasites. Results (mean  $\pm$  SEM) are  
957 representative of two independent experiment with pooled ears (2 ears) samples (n=6 mice per  
958 group). ns, p> 0.48; \*\*p> 0.009. **E.** Analysis of the early immune response following needle  
959 challenge with wildtype *L. major*-parasites. Twenty hours post-challenge, ear-derived cells were  
960 analyzed for IFN- $\gamma$  producing CD3<sup>+</sup>CD4<sup>+</sup>CD44<sup>hi</sup>T-bet<sup>+</sup>Ly-6C<sup>+</sup> T cells in response to 12-14 hours  
961 of *in-vitro* re-stimulation with freeze-thaw *L. major* antigen (*LmFTAg*) plus naïve splenic APCs.  
962 Results (mean  $\pm$  SEM) are representative of two independent experiment with pooled ears (2ears)  
963 samples (n=6 mice per group). Statistical analysis was performed by unpaired two-tailed t-test (ns,  
964 p=0.31, \*p> 0.02 and \*\*p> 0.004). **F** and **G.** Five weeks of post-challenge with *L. major* WT  
965 infected sand fly, both ear (**F**) and draining lymph nodes (**G**) parasite load were determined by  
966 serial dilution. Results are geometric means with 95% CI of total 5-8 mice in each group. Data are  
967 representative of one independent experiment. Statistical analysis was performed by non-  
968 parametric Mann-Whitney two-tailed test (ns, p=0.34; \*\*p<0.004).
